# Supplementary material for: Iridium(I)-Catalyzed Isoindolinone-Directed Branched-Selective Aromatic C–H Alkylation with Simple Alkenes
Source: MDPI journal article supplement (doi:10.3390/molecules27061923), 2022-03-16
Supplement: s1 [file s1]

# Supporting Information

## Iridium (I)-Catalyzed Isoindolinone-Directed Branched-Selective Aromatic C–H Alkylation with Simple Al- kenes

Maoqian Xiong, Yuhang Shu, Jie Tang, Fan Yang \* and Dong Xing \*

Shanghai Engineering Research Center of Molecular Therapeutics and New Drug Development, School of Chemistry and Molecular Engineering, East China Normal University, Shanghai 200062, China;  
18772300619@163.com (M.X.); shuyh2022@163.com (Y.S.); jtang@chem.ecnu.edu.cn (J.T.)

\* Correspondence: fyang@chem.ecnu.edu.cn (F.Y.); dxing@sat.ecnu.edu.cn (D.X.)

### Table of Contents

|                                                                 |     |
|-----------------------------------------------------------------|-----|
| 1. Screening of Chiral Ligands and Condition Optimizations..... | S2  |
| 2. NMR Spectra .....                                            | S3  |
| 3. HPLC Spectra.....                                            | S19 |

## 1. Screening of Chiral Ligands and Condition Optimizations<sup>a</sup>

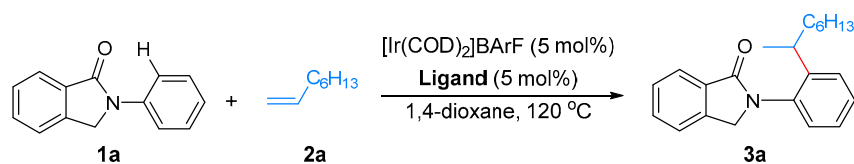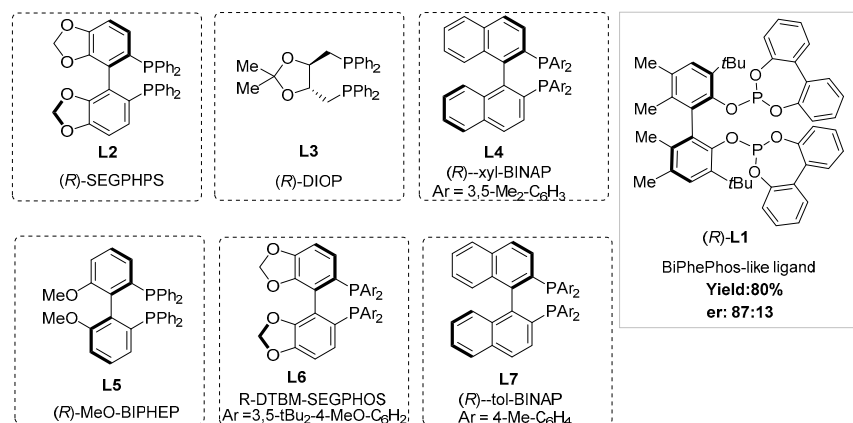

| Entry | Ligand         | solvent          | Yield (%) <sup>b</sup> | er <sup>c</sup> | b/l <sup>d</sup> |
|-------|----------------|------------------|------------------------|-----------------|------------------|
| 1     | <b>(R)-L1</b>  | 1,4-dioxane      | 81%                    | 86:14           | >20:1            |
| 2     | <b>L2</b>      | 1,4-dioxane      | 21%                    | 54:46           | >20:1            |
| 3     | <b>L3</b>      | 1,4-dioxane      | 56%                    | 56:44           | 13:1             |
| 4     | <b>L4</b>      | 1,4-dioxane      | 16%                    | 65:35           | 18:1             |
| 5     | <b>L5</b>      | 1,4-dioxane      | 42%                    | 68:32           | 10:1             |
| 6     | <b>L6</b>      | 1,4-dioxane      | Trace                  |                 |                  |
| 7     | <b>L7</b>      | 1,4-dioxane      | 11%                    | 60:40           | 7:1              |
| 8     | <b>(R)-L1</b>  | CPME             | 80                     | 87:13           | > 20:1           |
| 9     | <b>(R)- L1</b> | toluene          | 55                     | 86:14           | >20:1            |
| 10    | <b>(R)- L1</b> | DCE              | 53                     | 86:14           | >20:1            |
| 11    | <b>(R)- L1</b> | PhCl             | 61                     | 86:14           | >20:1            |
| 12    | <b>(R)- L1</b> | <i>m</i> -xylene | 60                     | 86:14           | >20:1            |
| 13    | <b>(R)- L1</b> | DME              | 48                     | 84:16           | >20:1            |
| 14    | <b>(S)-L1</b>  | CPME             | 79                     | 14:86           | >20:1            |

<sup>a</sup>Reaction conditions: **1a** (0.1mmol), **2a** (0.5 mmol),  $[\text{Ir}(\text{COD})_2]\text{BARF}$  (5 mol %), Ligand(5 mol%), solvent (0.2 mL), 120 °C, 48 h, <sup>b</sup>isolated yield for branched-selective product, <sup>c</sup>The er value of the product was determined by chiral HPLC analysis. <sup>d</sup>The linear/branched (l/b) ratio was determined by GC.

## 2. NMR Spectra

### $^1\text{H}$ NMR Spectrum of Compound **3a**

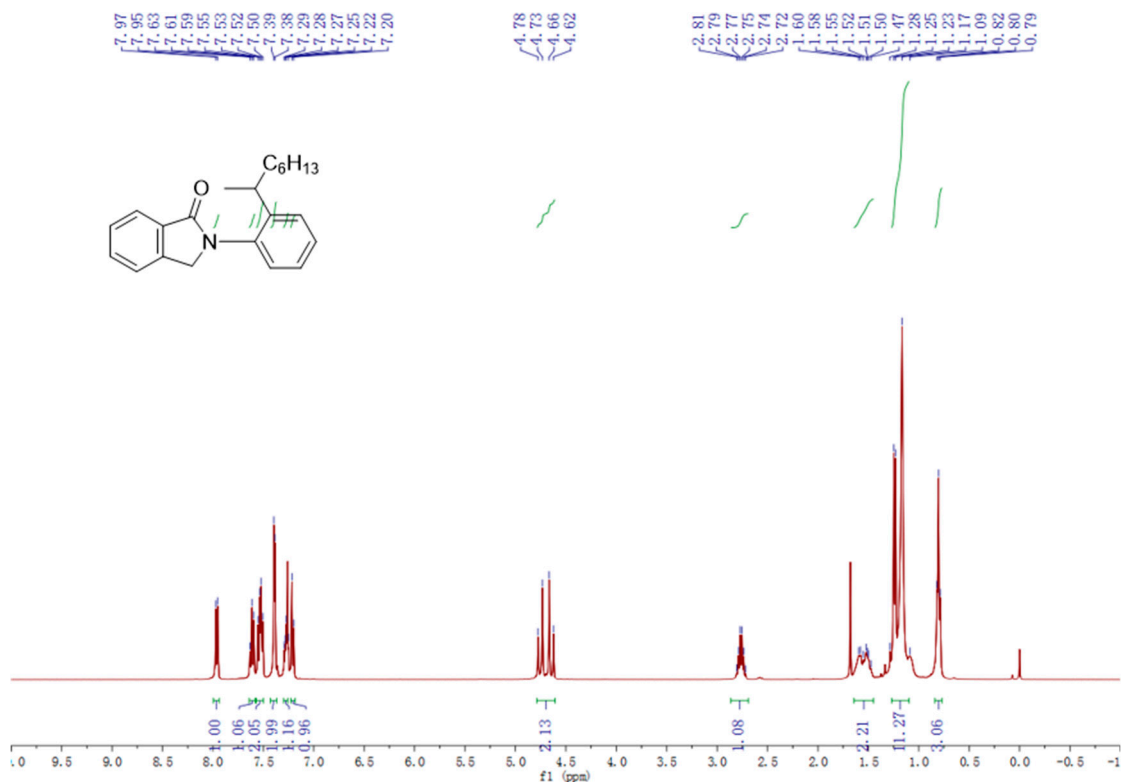

### $^{13}\text{C}$ NMR Spectrum of Compound **3a**

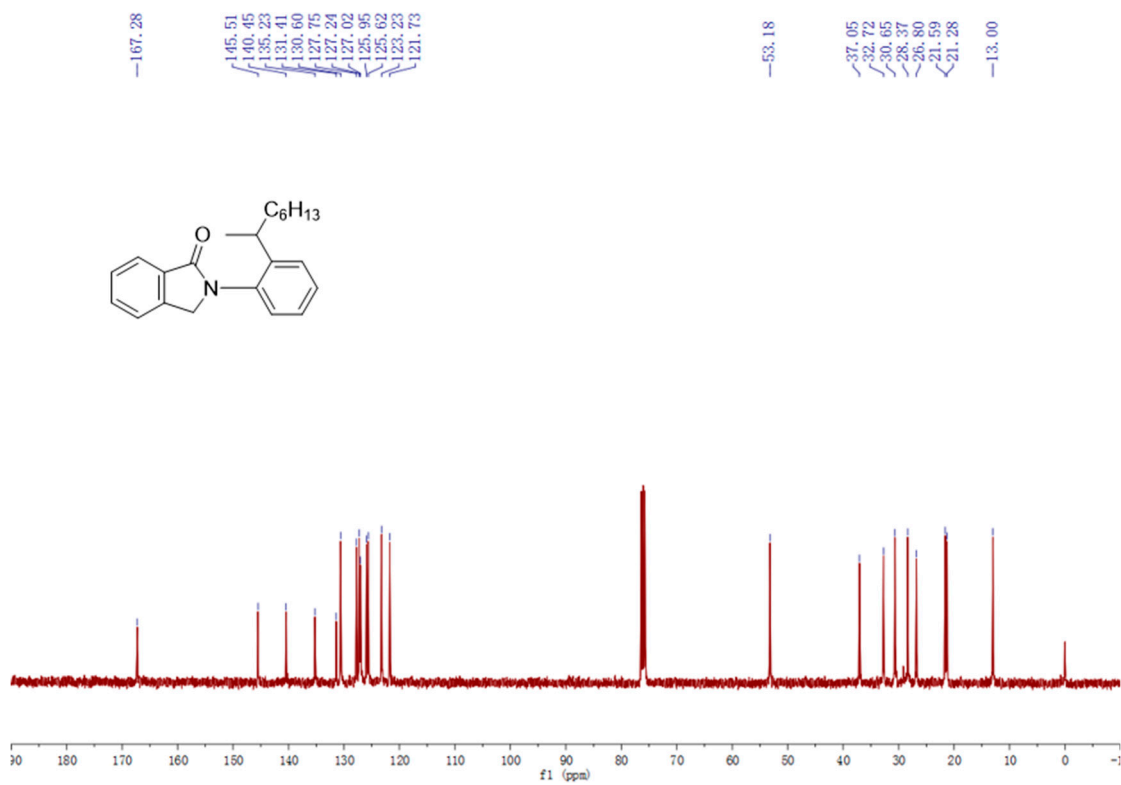

# <sup>1</sup>H NMR Spectrum of Compound **3b**

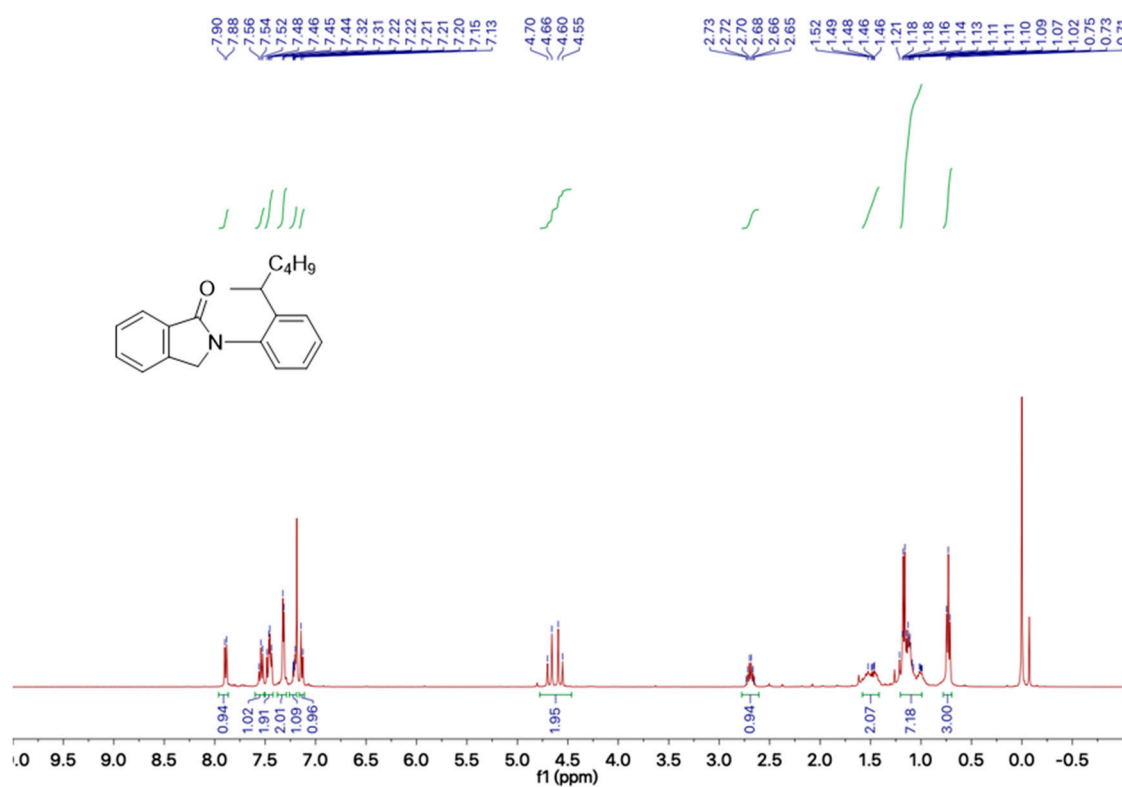

# <sup>13</sup>C NMR Spectrum of Compound **3b**

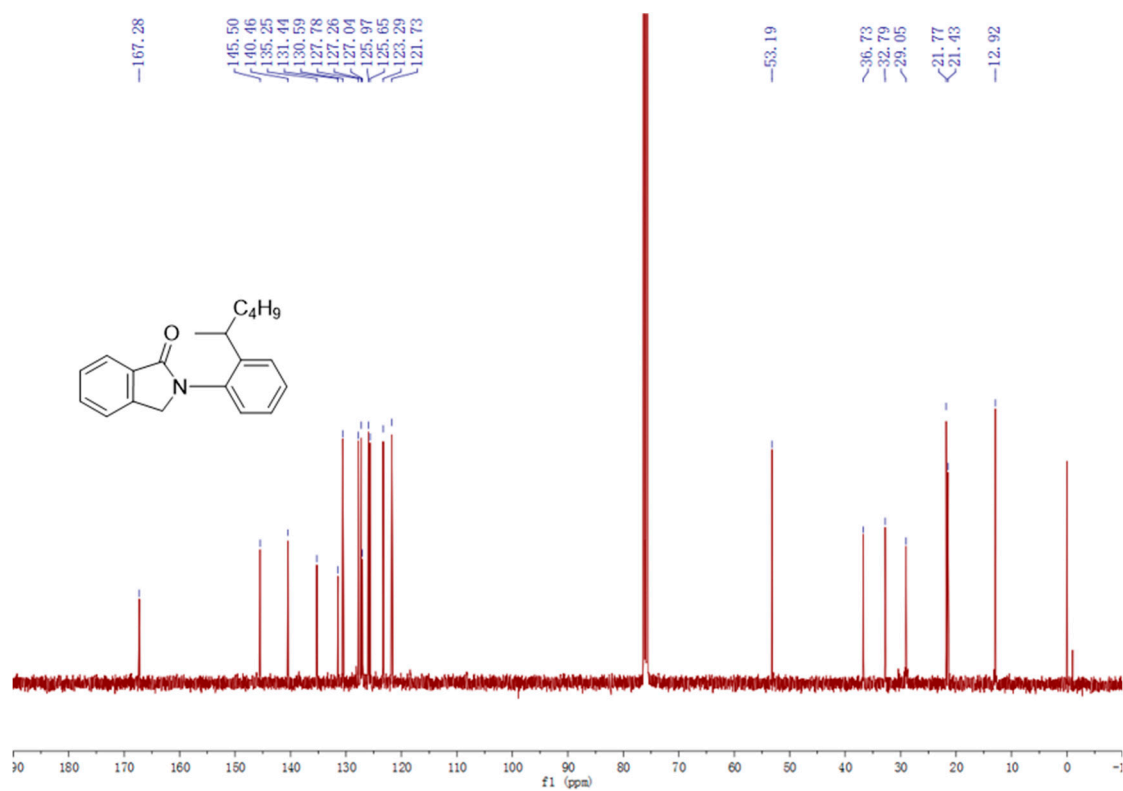

# <sup>1</sup>H NMR Spectrum of Compound **3c**

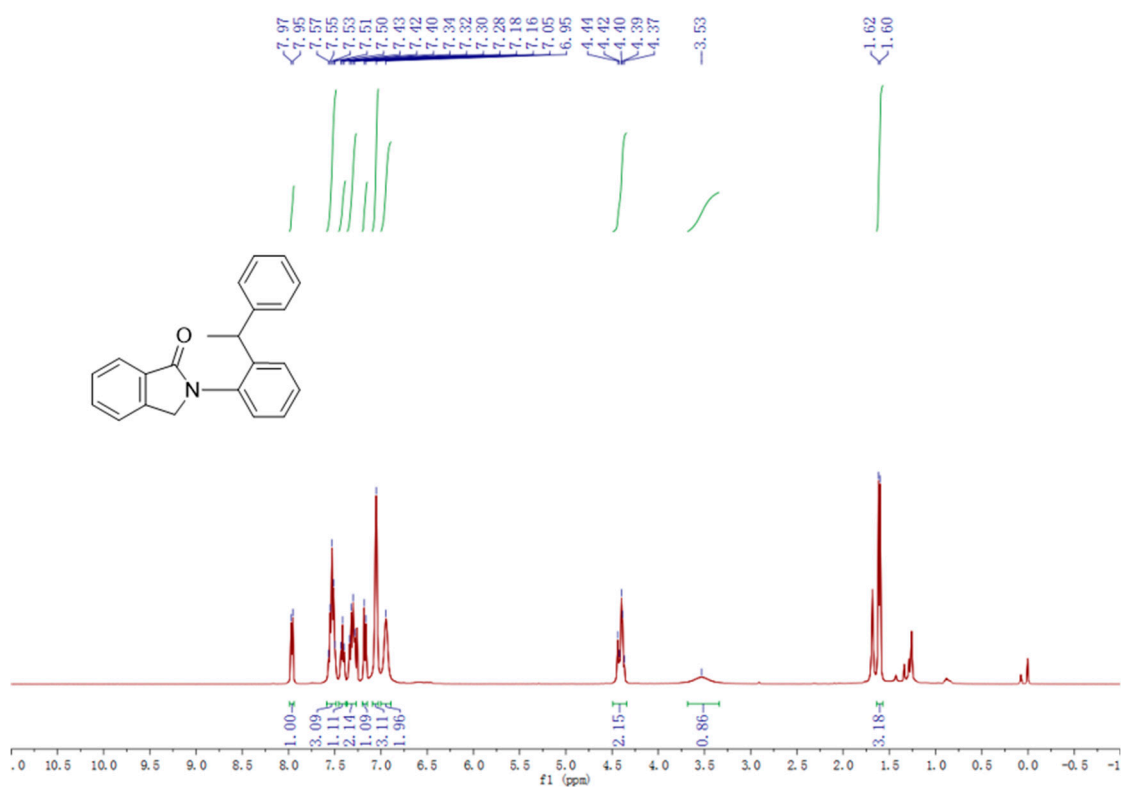

# <sup>13</sup>C NMR Spectrum of Compound **3c**

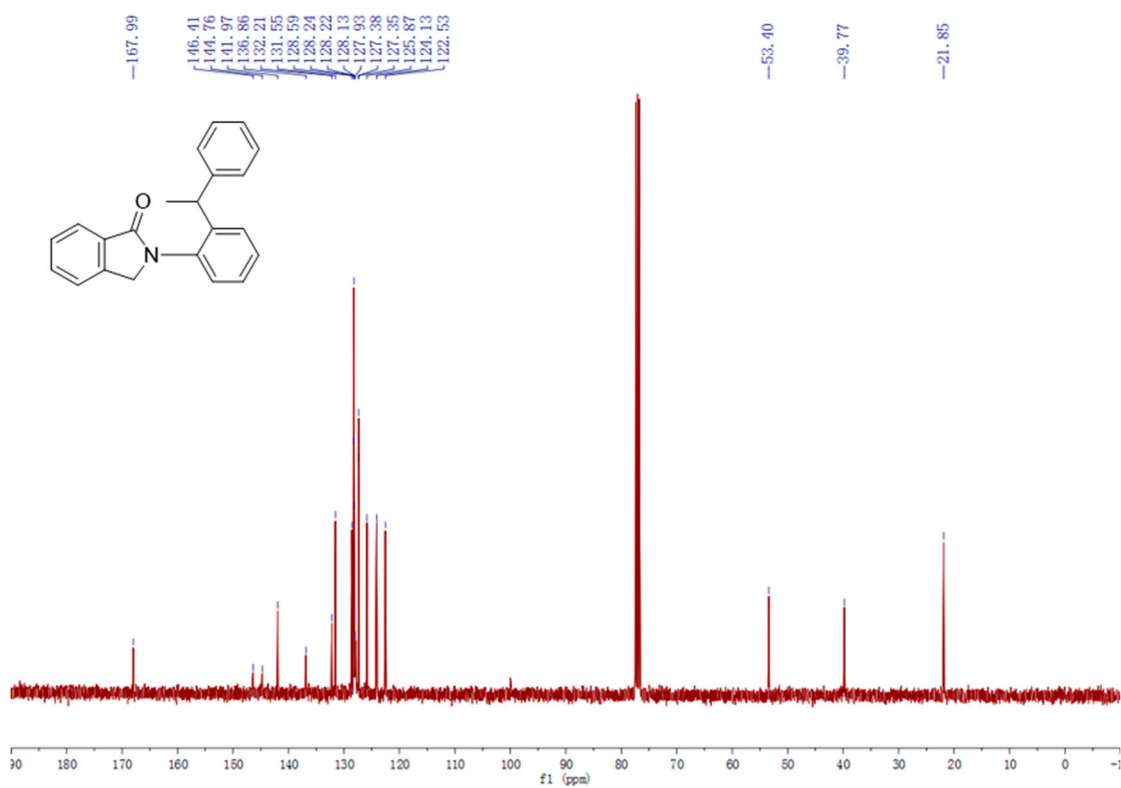

# <sup>1</sup>H NMR Spectrum of Compound **3d**

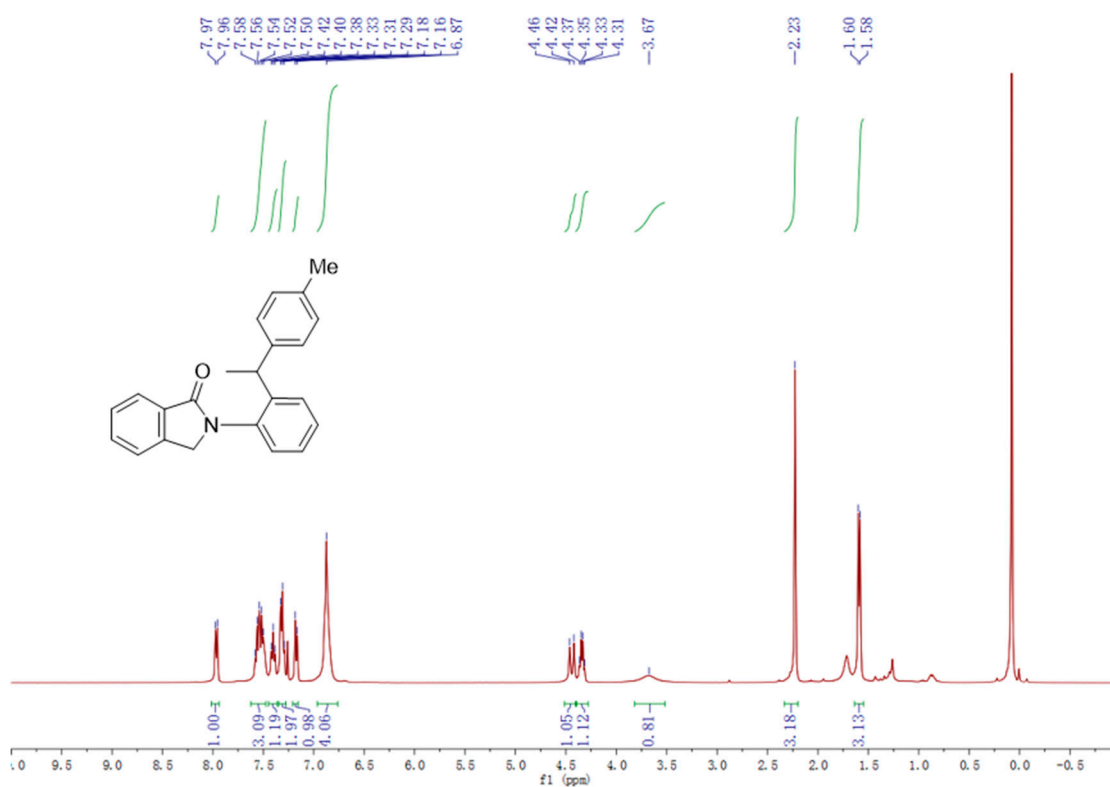

# <sup>13</sup>C NMR Spectrum of Compound **3d**

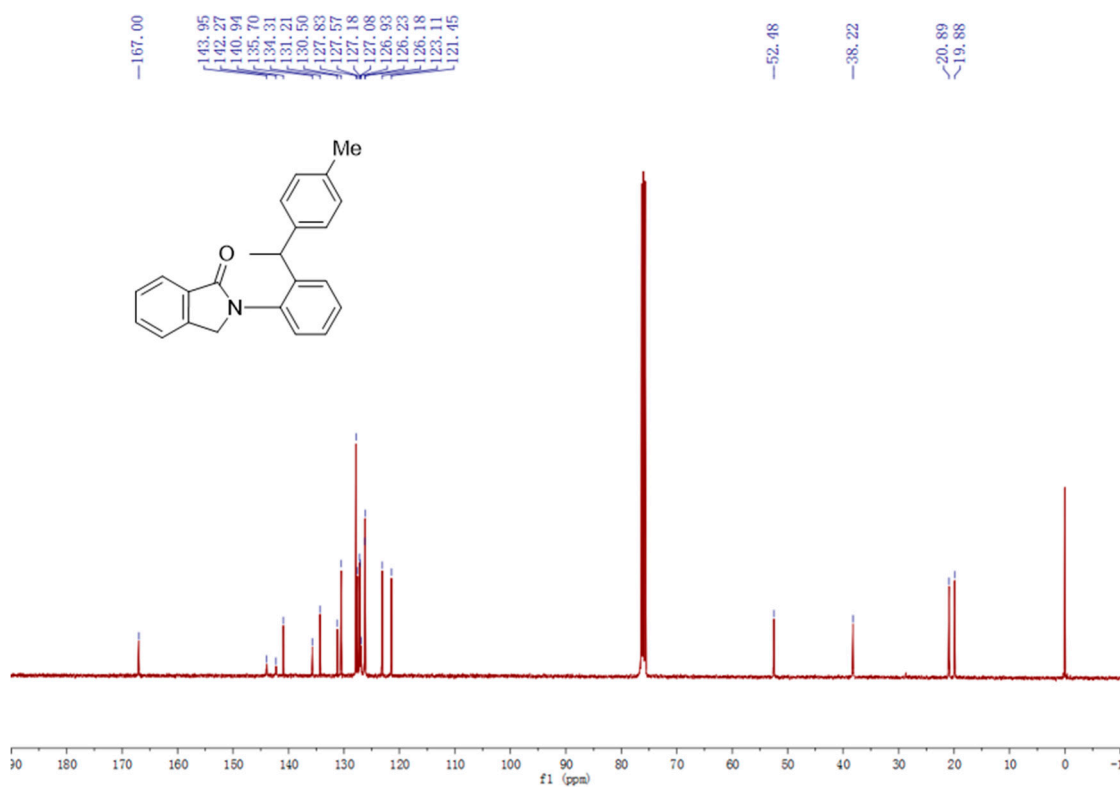

# <sup>1</sup>H NMR Spectrum of Compound 3e

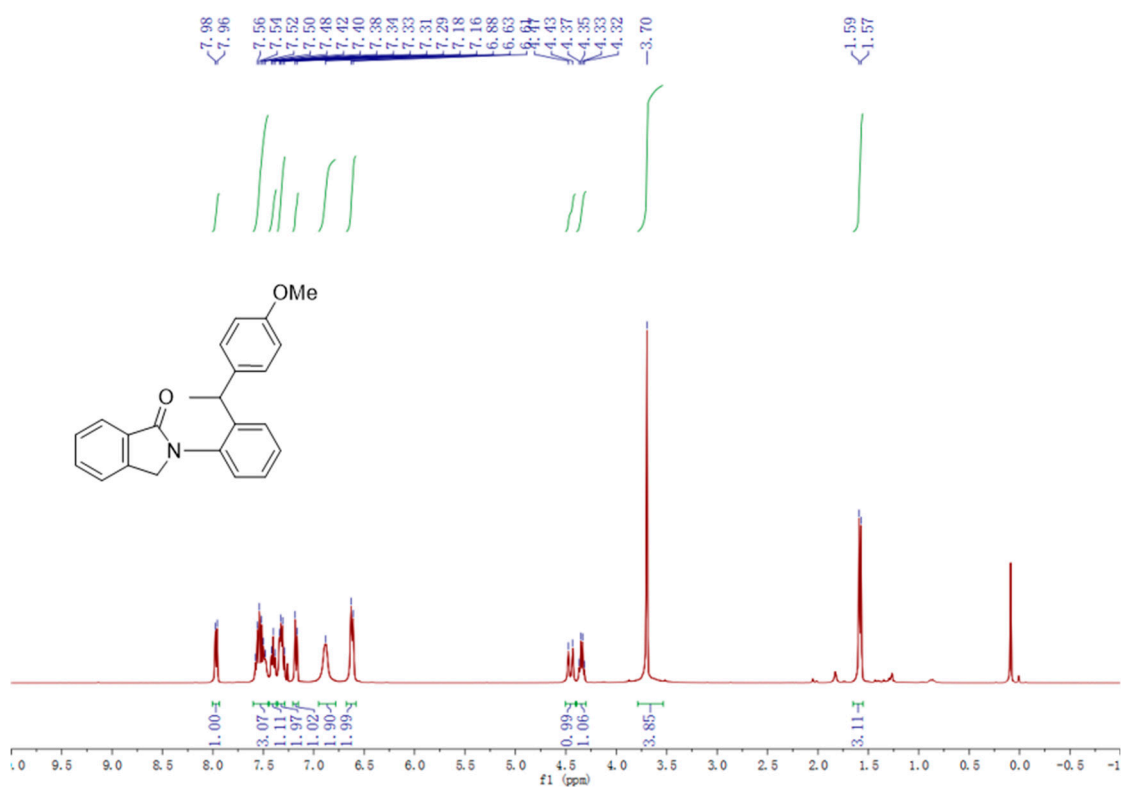

# <sup>13</sup>C NMR Spectrum of Compound 3e

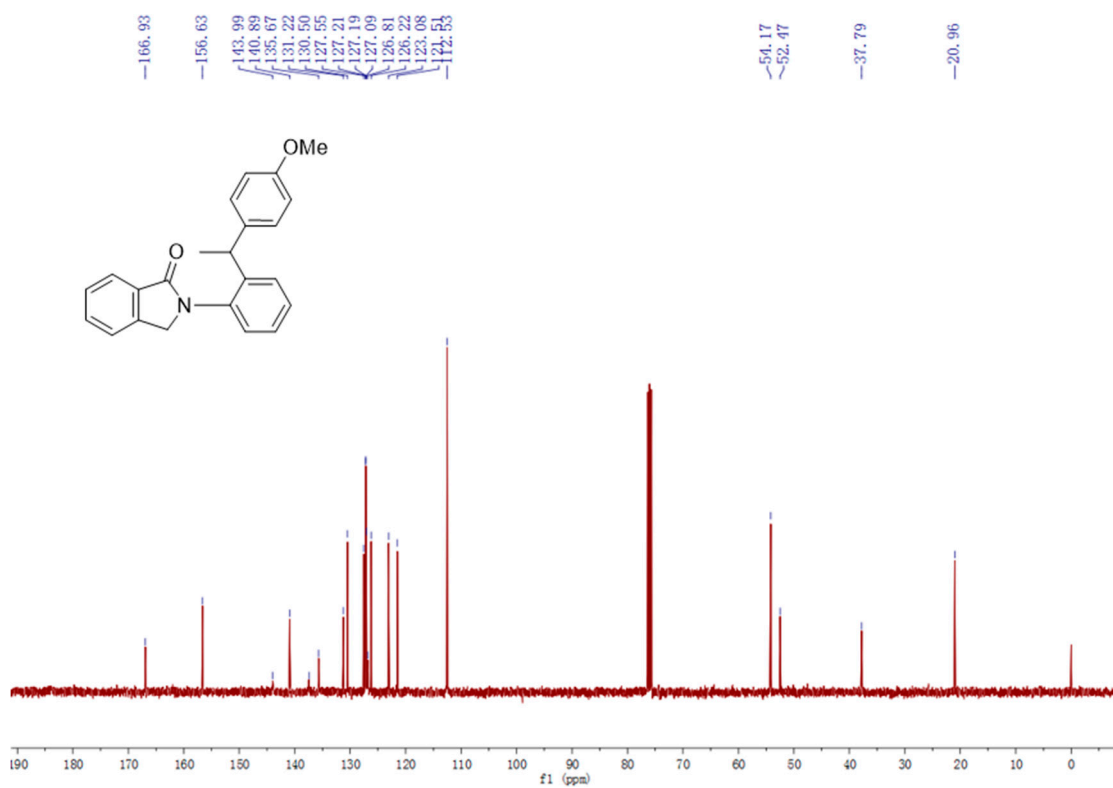

# <sup>1</sup>H NMR Spectrum of Compound **3f**

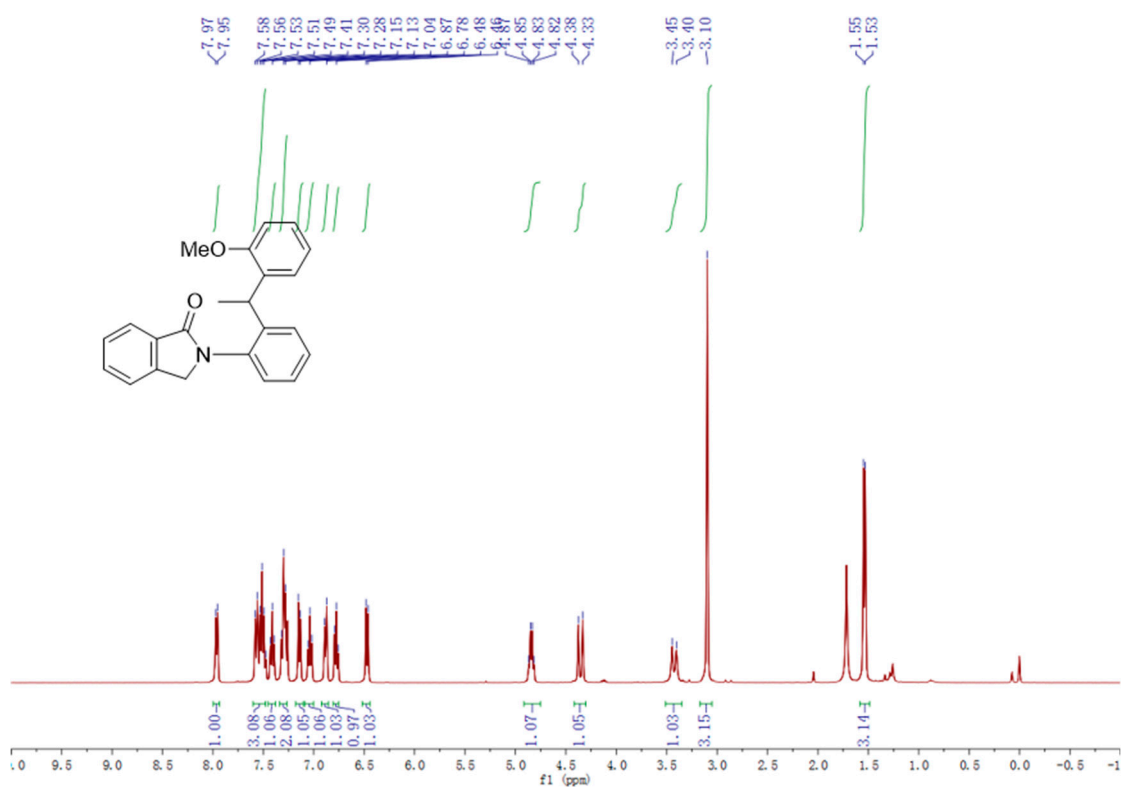

# <sup>13</sup>C NMR Spectrum of Compound **3f**

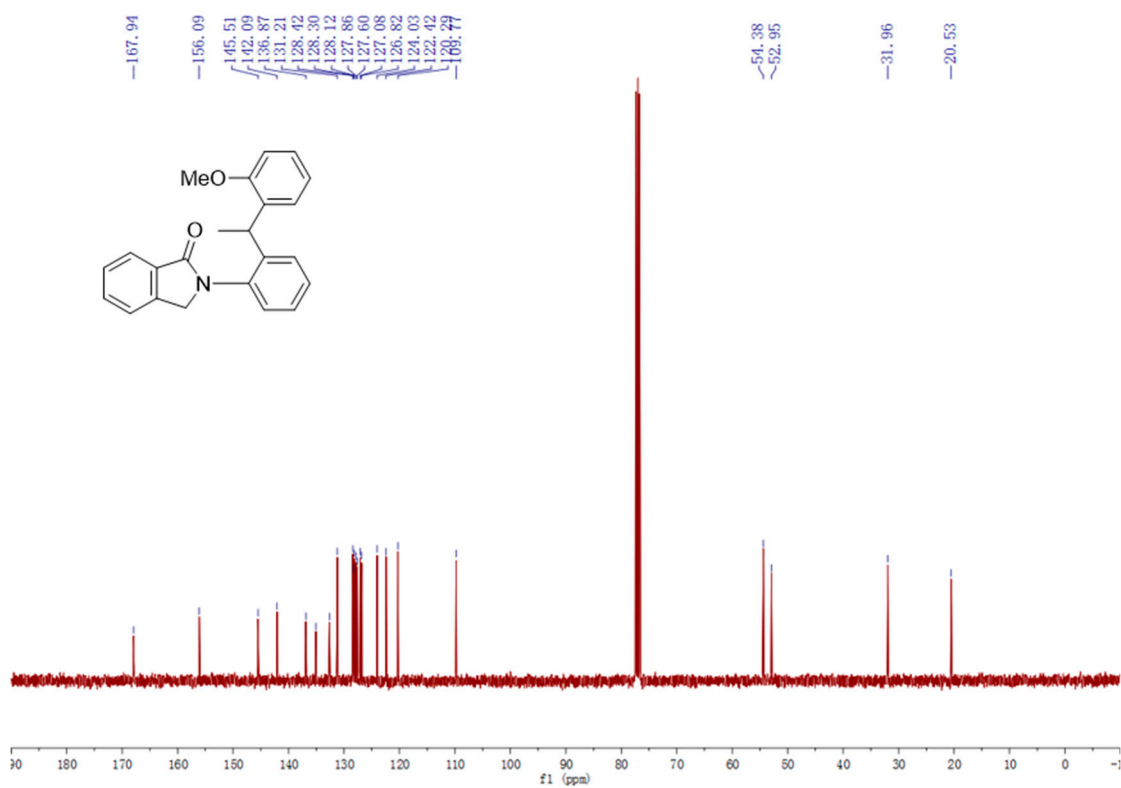



# <sup>1</sup>H NMR Spectrum of Compound **3g**

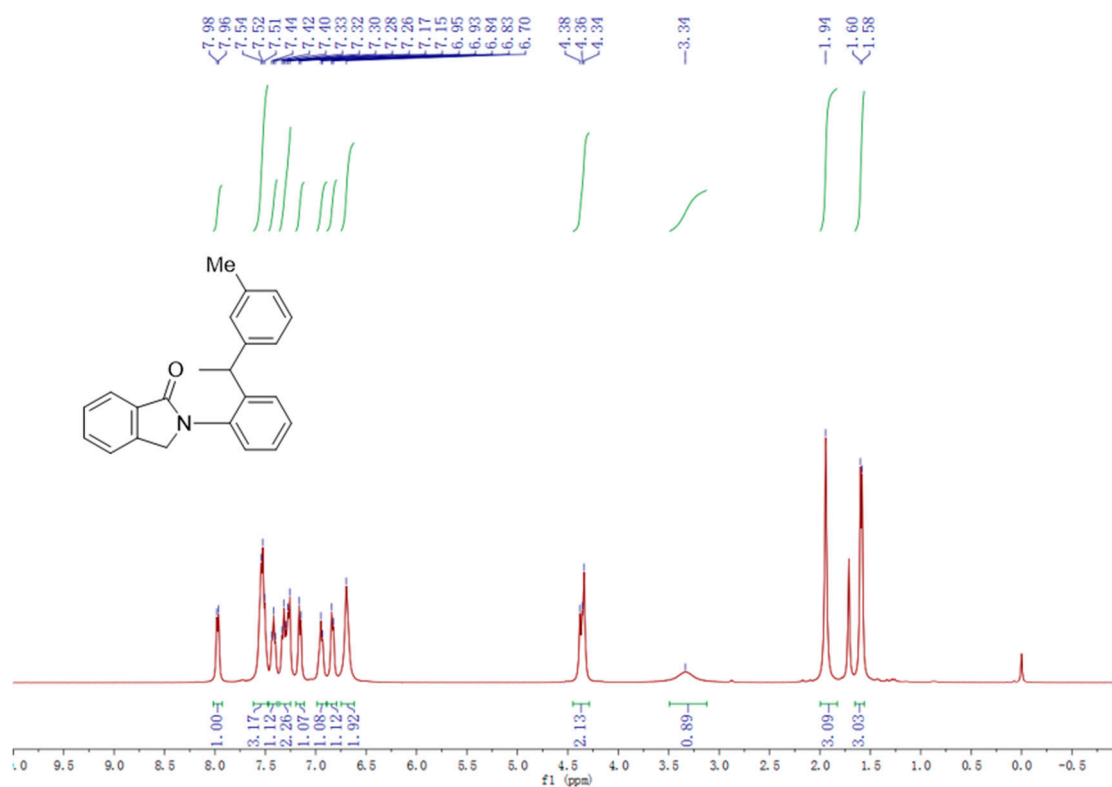

# <sup>13</sup>C NMR Spectrum of Compound **3g**

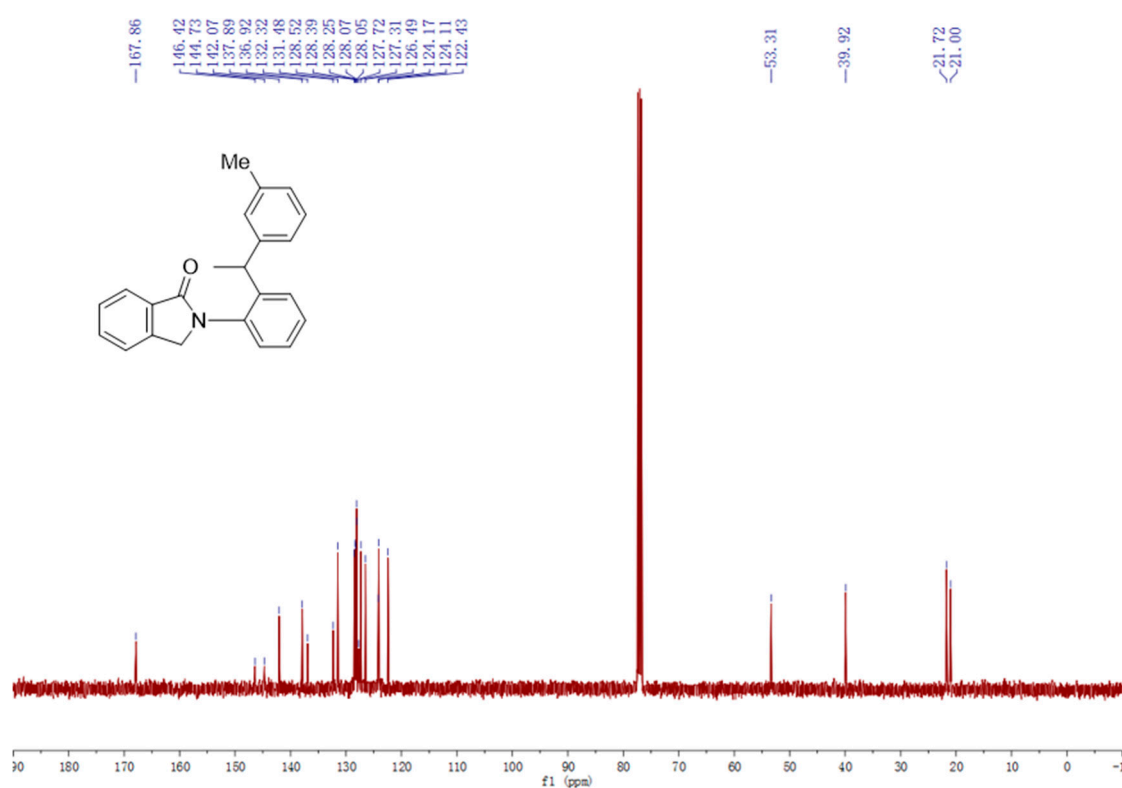

# <sup>1</sup>H NMR Spectrum of Compound **3h**

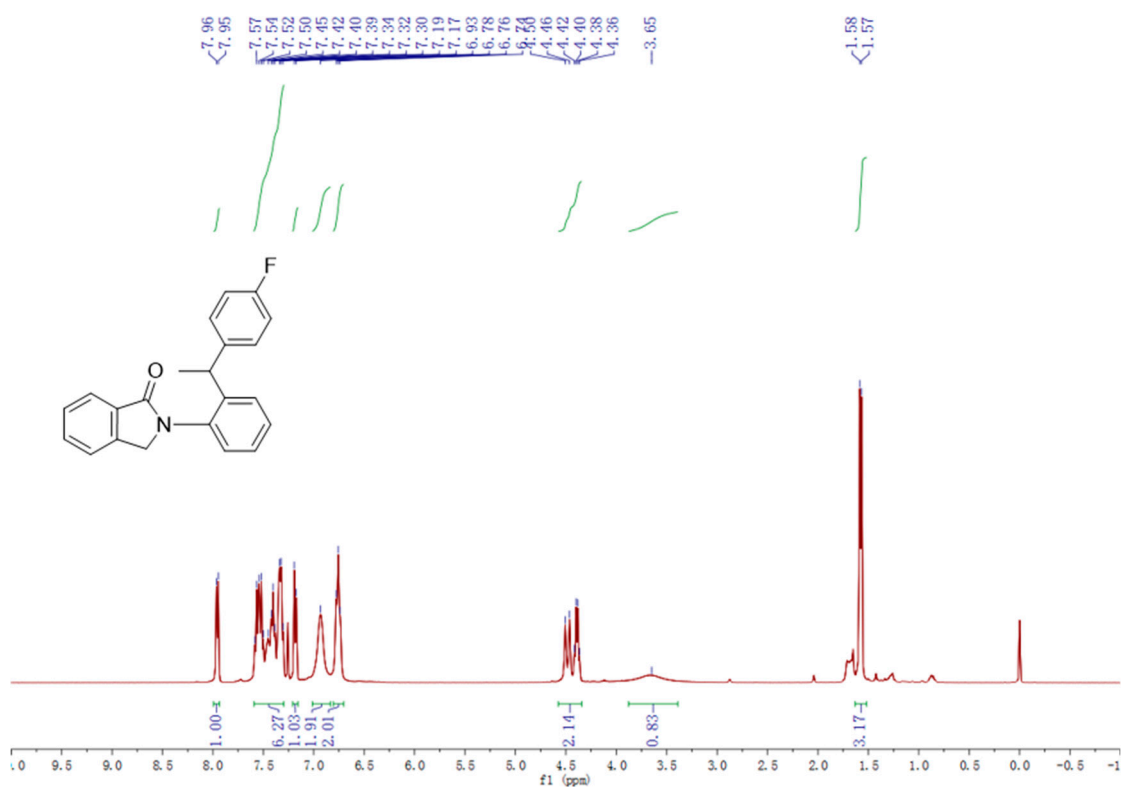

# <sup>13</sup>C NMR Spectrum of Compound **3h**

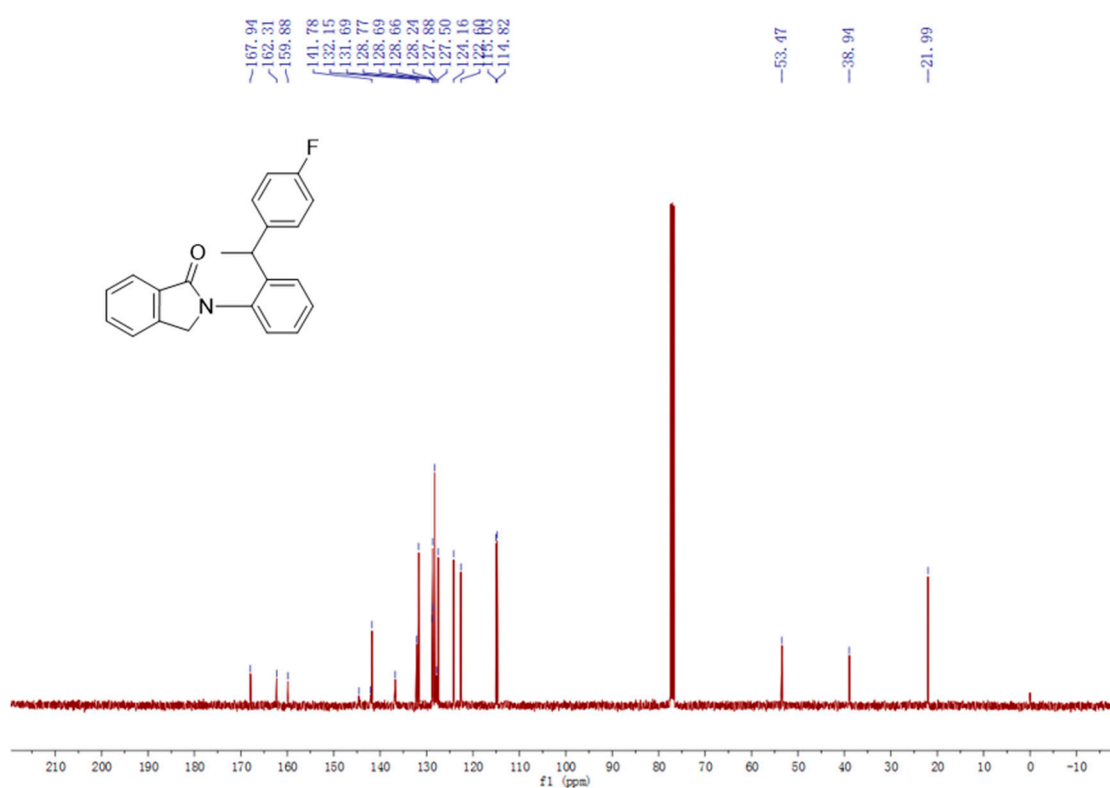

# <sup>1</sup>H NMR Spectrum of Compound **3i**

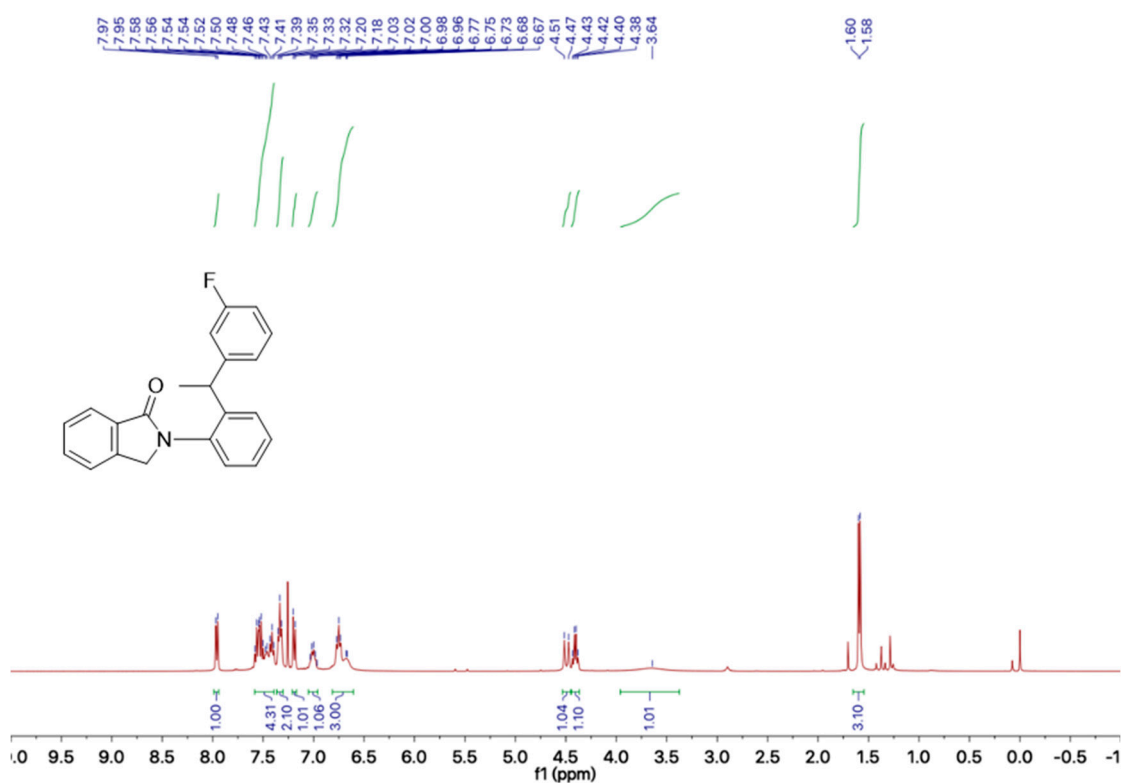

# <sup>13</sup>C NMR Spectrum of Compound **3i**

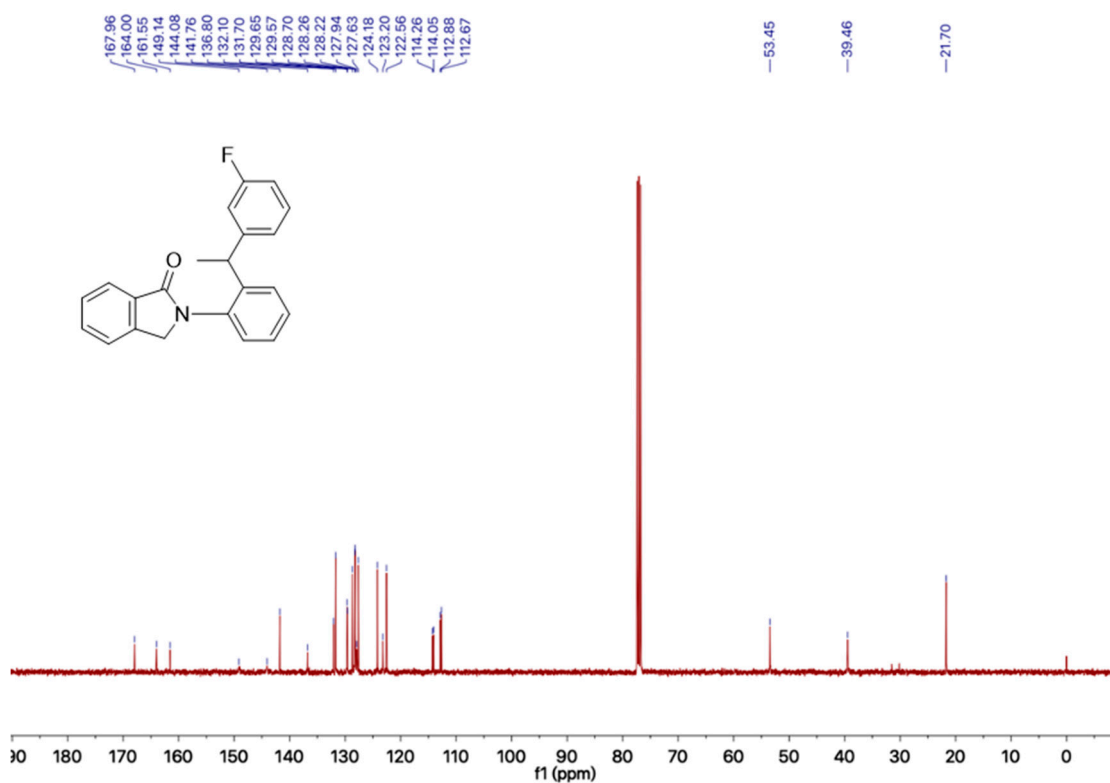

# <sup>1</sup>H NMR Spectrum of Compound **3j**

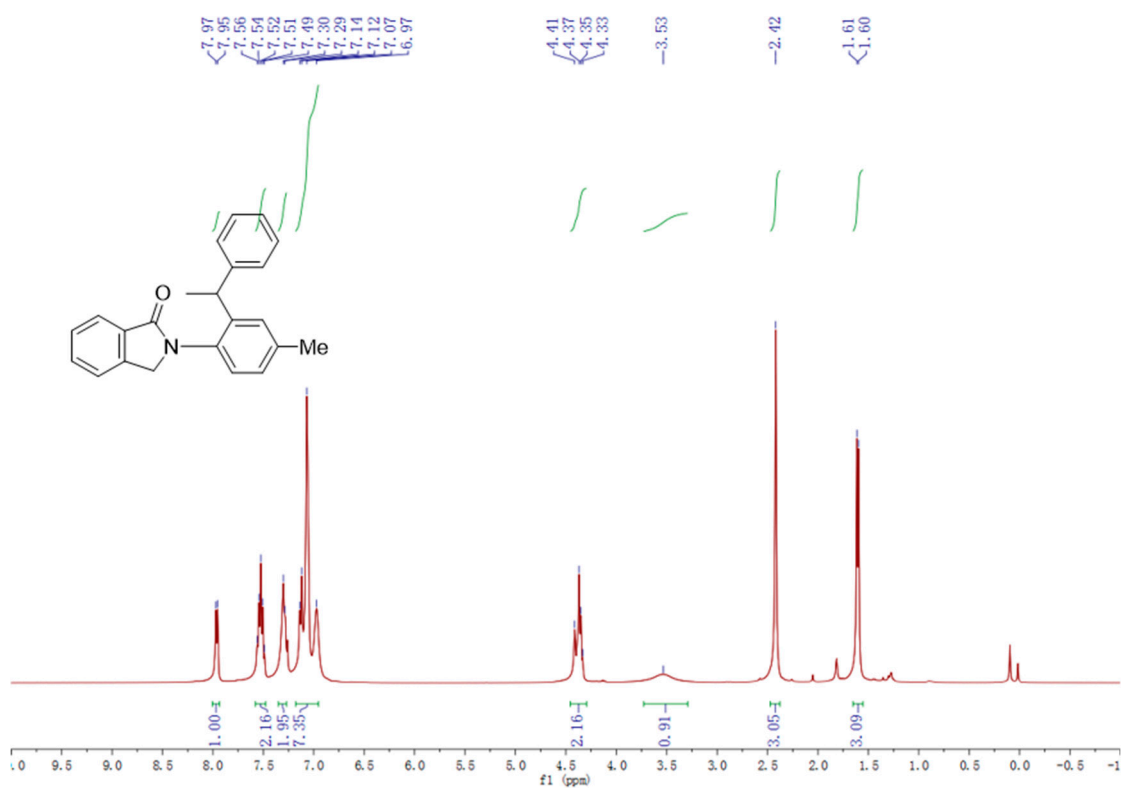

# <sup>13</sup>C NMR Spectrum of Compound **3j**

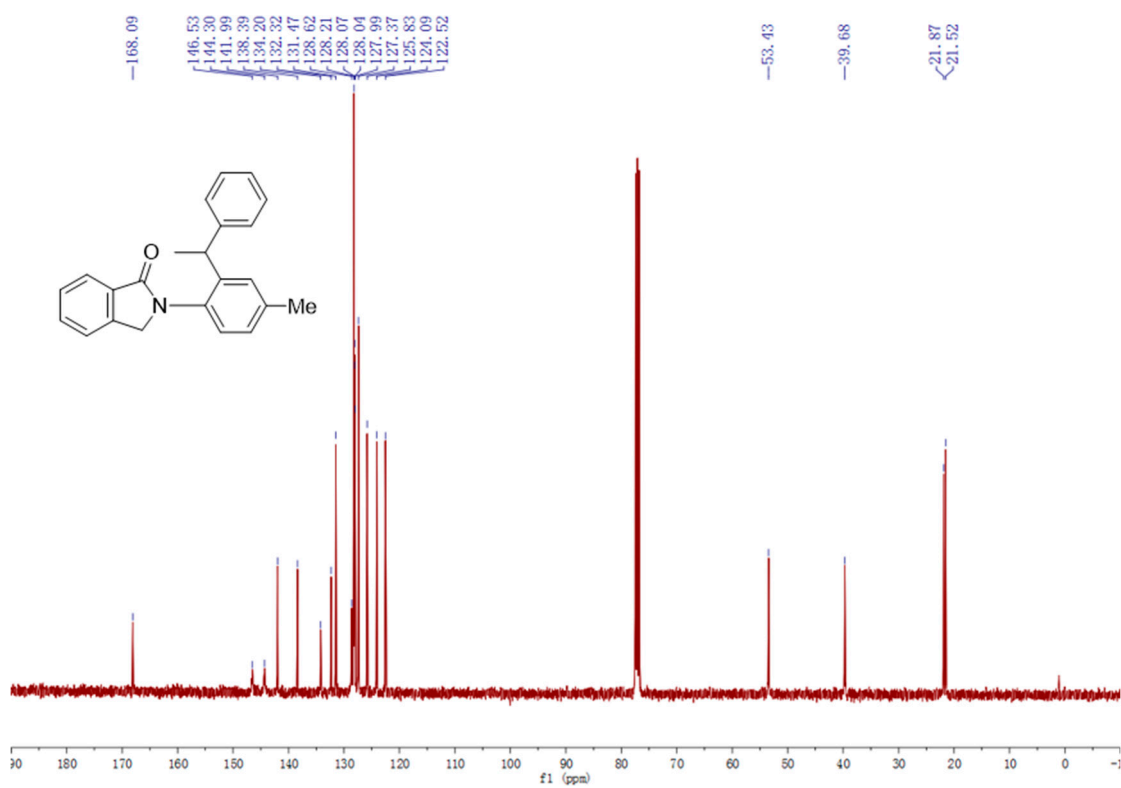

# <sup>1</sup>H NMR Spectrum of Compound **3k**

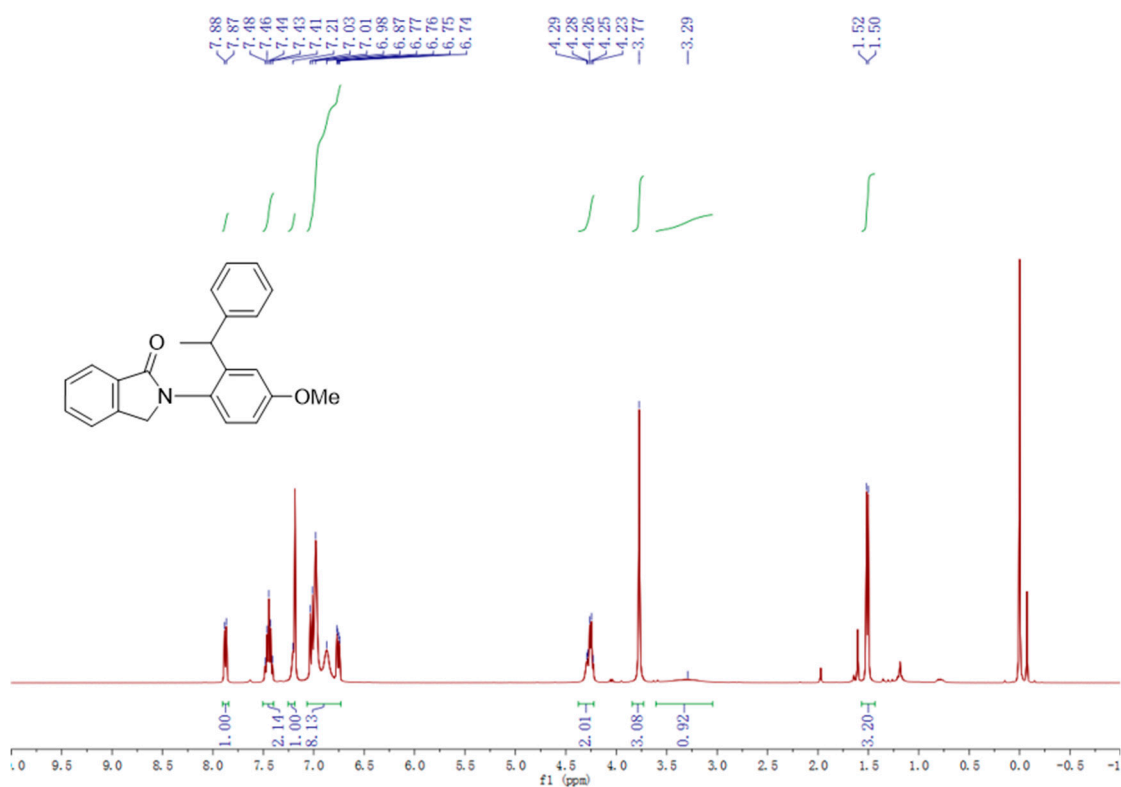

# <sup>13</sup>C NMR Spectrum of Compound **3k**

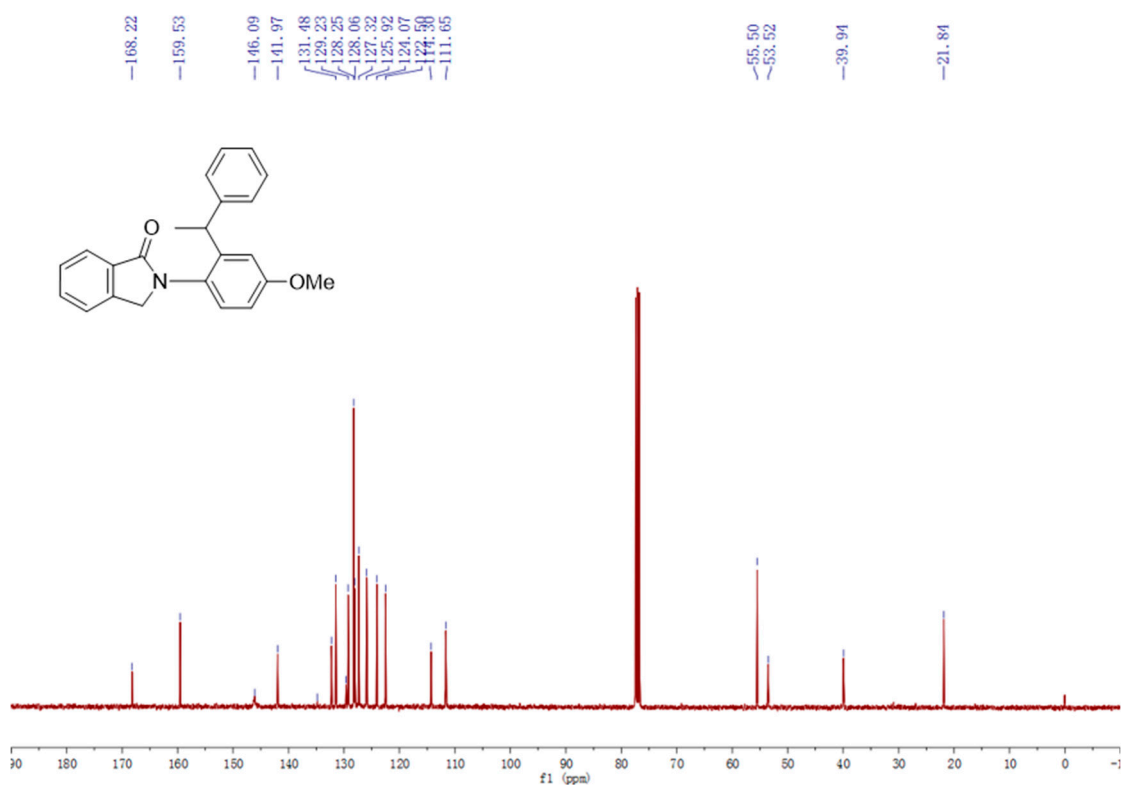

# <sup>1</sup>H NMR Spectrum of Compound **31**

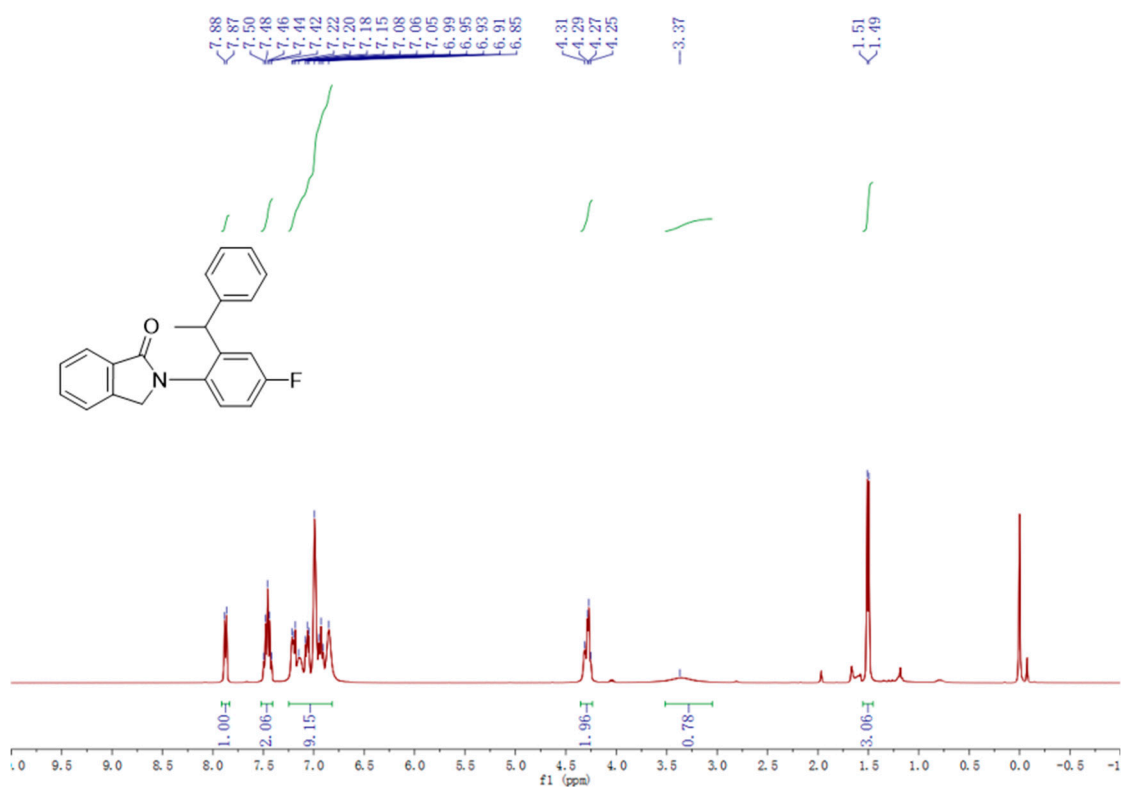

# <sup>13</sup>C NMR Spectrum of Compound **31**

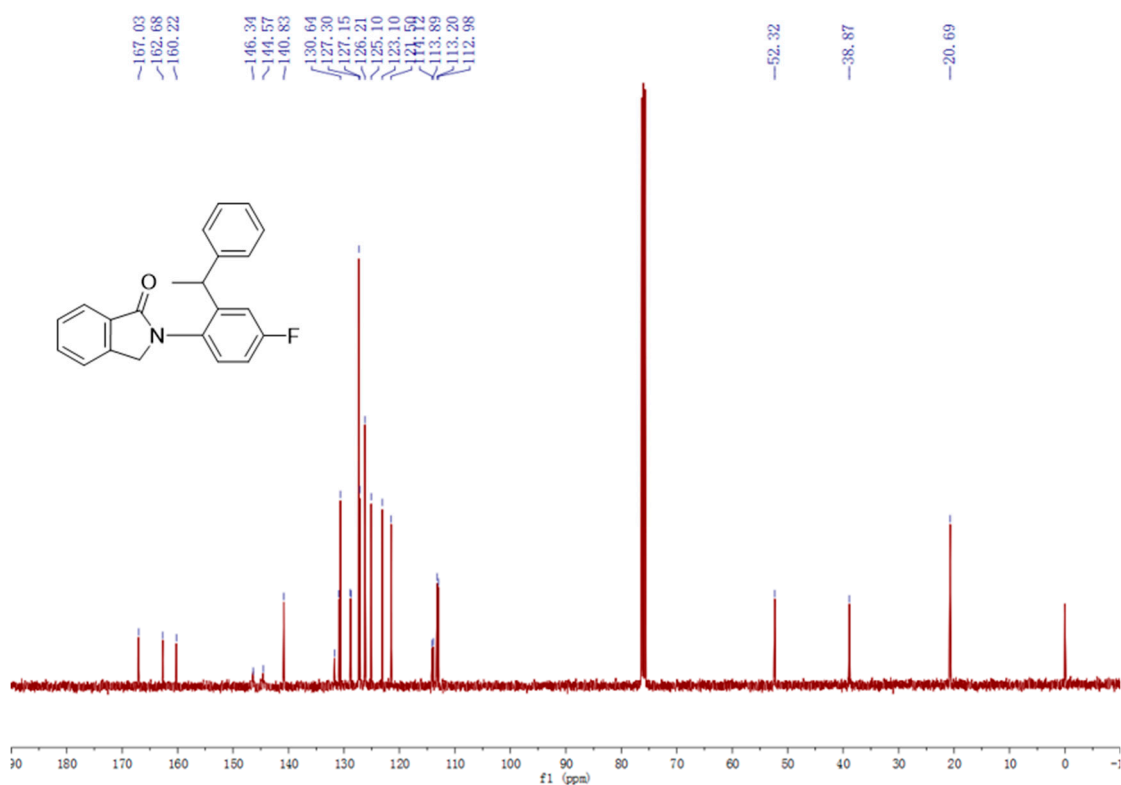

<sup>1</sup>H NMR Spectrum of Compound **3m**

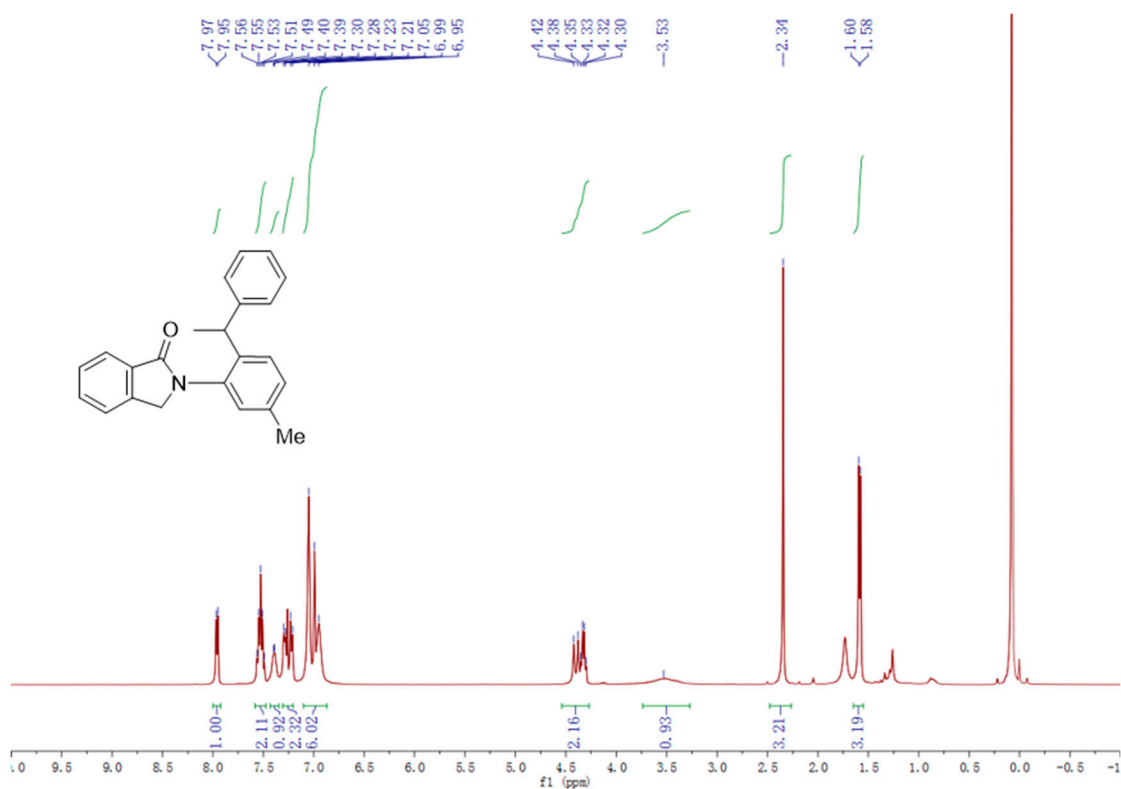

<sup>13</sup>C NMR Spectrum of Compound **3m**

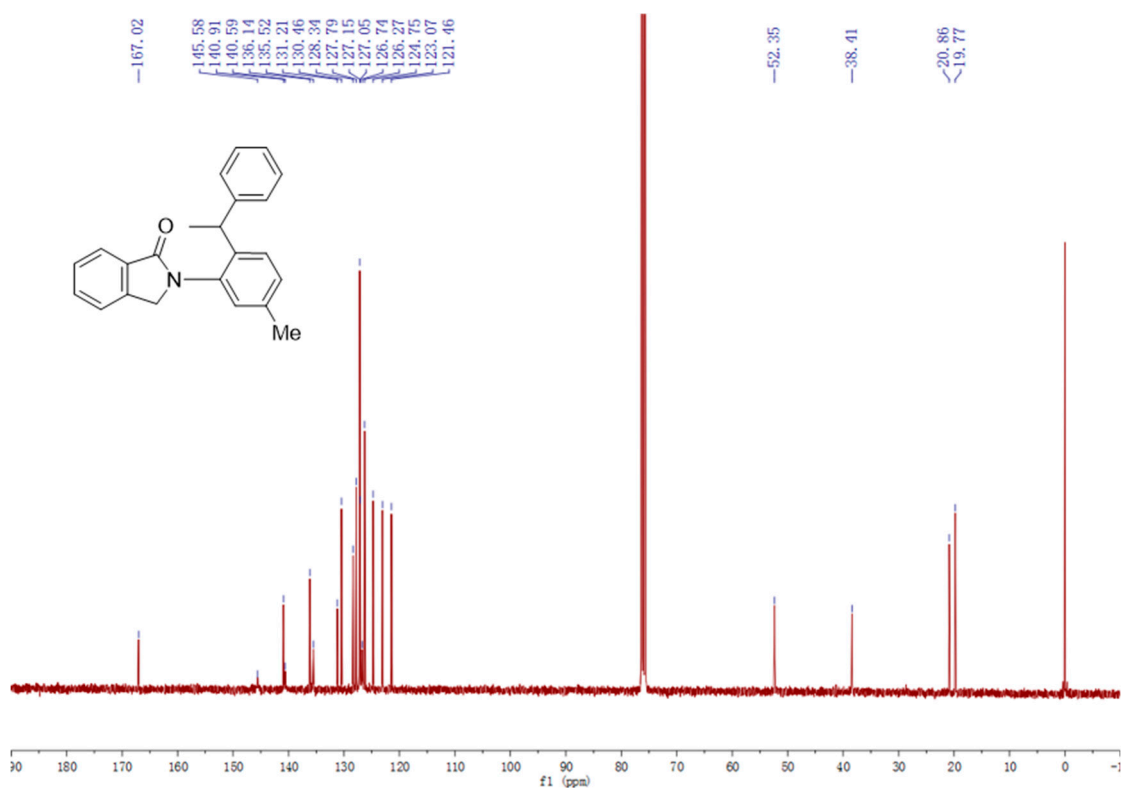

# <sup>1</sup>H NMR Spectrum of Compound **3n**

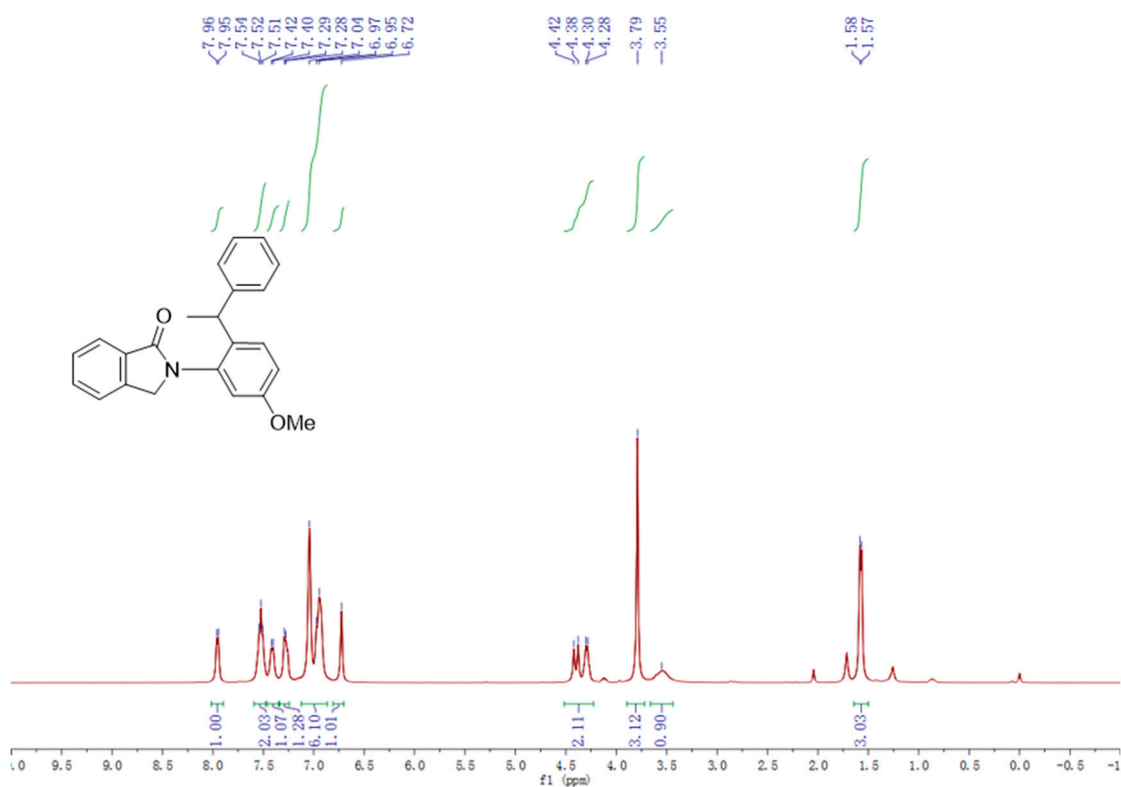

# <sup>13</sup>C NMR Spectrum of Compound **3n**

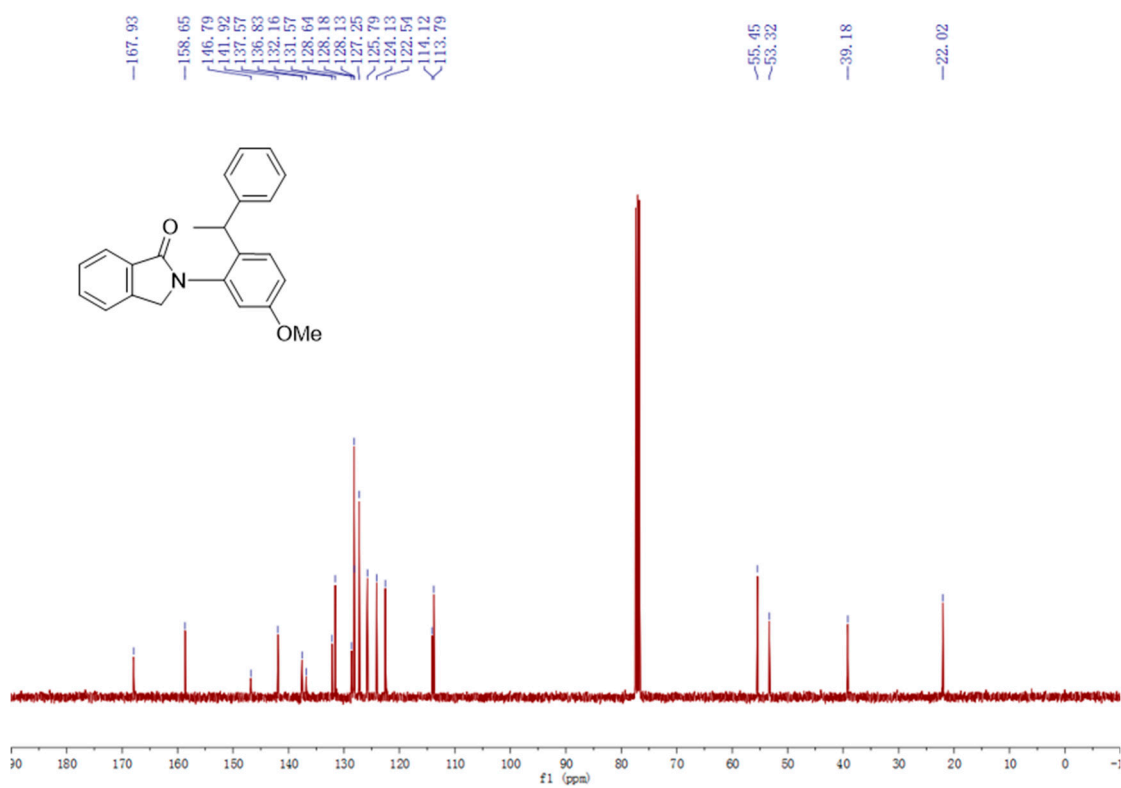



<sup>1</sup>H NMR Spectrum of Compound **3o**

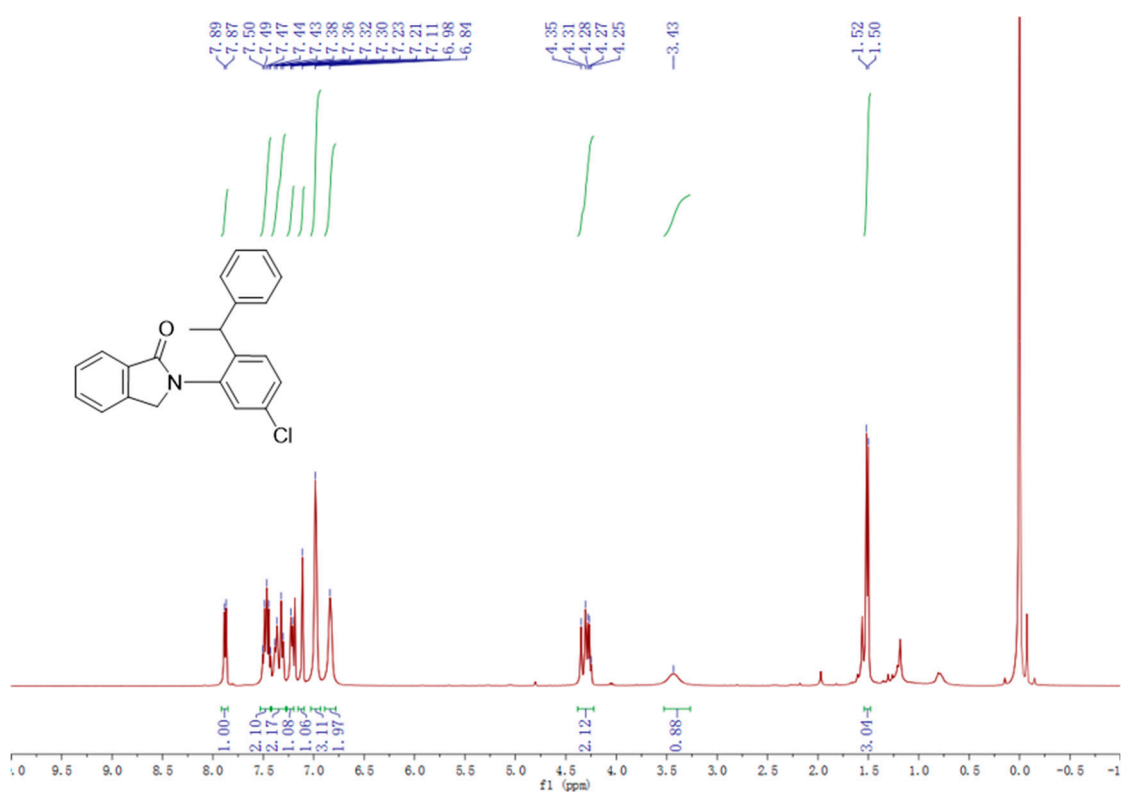

<sup>13</sup>C NMR Spectrum of Compound **3o**

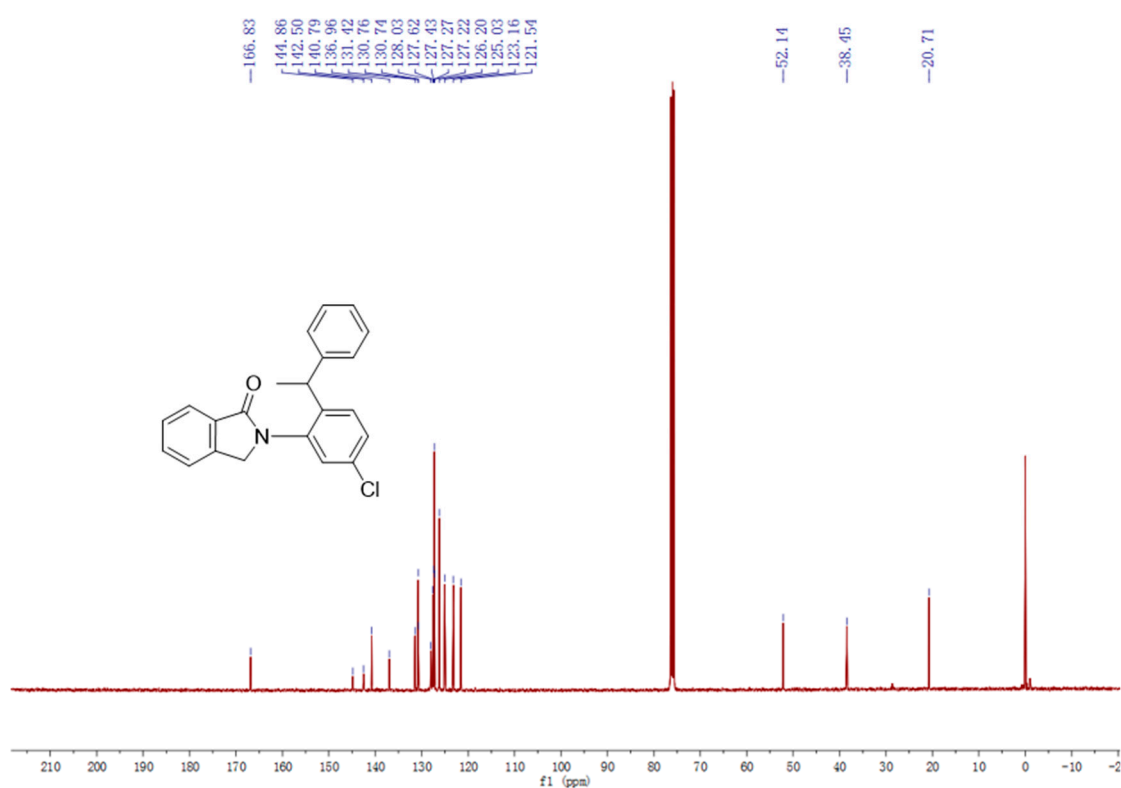

# <sup>1</sup>H NMR Spectrum of Compound **3p**

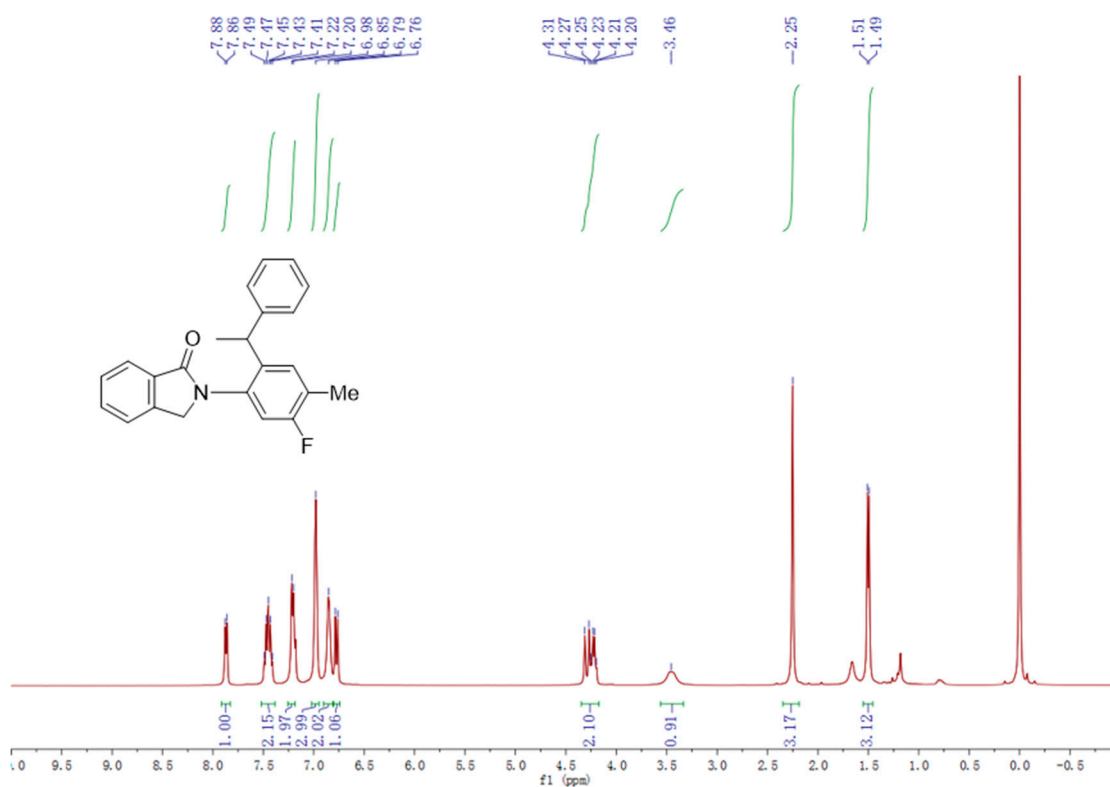

# <sup>13</sup>C NMR Spectrum of Compound **3p**

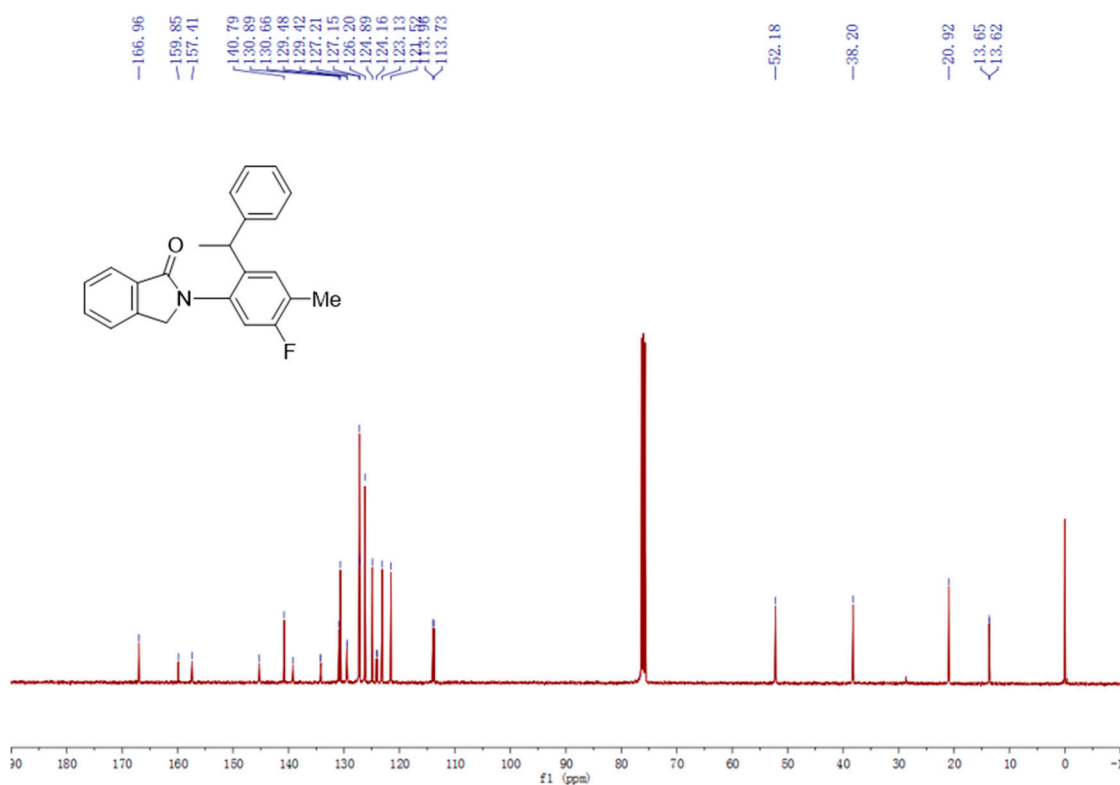

### 3. HPLC Spectra

HPLC spectra for compound *ent*-**3a** ((*R*)-L1)

Chiralcel IC column, *n*-hexane/*i*-PrOH = 100:6, flow rate = 1.0 mL/min,  $\lambda$  = 254 nm,  $t_R$  (major isomer) = 35.110 min,  $t_R$  (minor isomer) = 29.957 min.

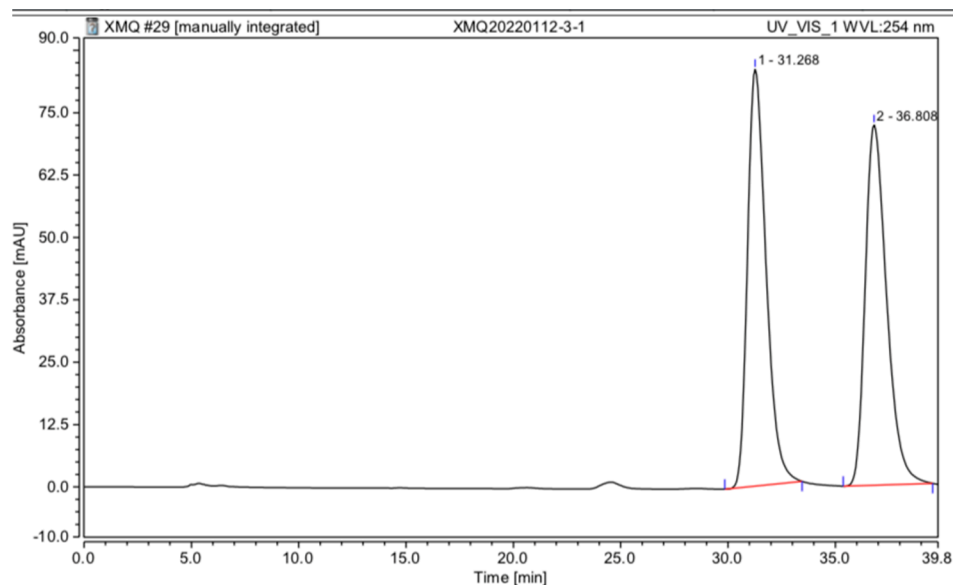

| Integration Results |           |                       |                 |               |                    |                |
|---------------------|-----------|-----------------------|-----------------|---------------|--------------------|----------------|
| No.                 | Peak Name | Retention Time<br>min | Area<br>mAU*min | Height<br>mAU | Relative Area<br>% | Amount<br>n.a. |
| 1                   |           | 31.268                | 83.613          | 83.545        | 50.09              | n.a.           |
| 2                   |           | 36.808                | 83.321          | 72.234        | 49.91              | n.a.           |
| Total:              |           |                       | 166.934         | 155.779       | 100.00             |                |

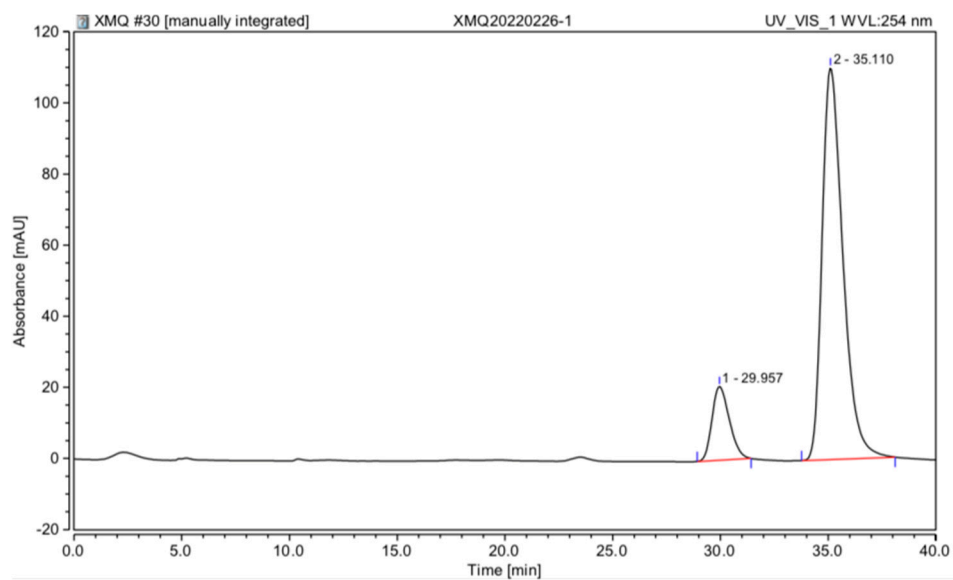

| Integration Results |           |                       |                 |               |                    |                |
|---------------------|-----------|-----------------------|-----------------|---------------|--------------------|----------------|
| No.                 | Peak Name | Retention Time<br>min | Area<br>mAU*min | Height<br>mAU | Relative Area<br>% | Amount<br>n.a. |
| 1                   |           | 29.957                | 18.882          | 20.487        | 13.26              | n.a.           |
| 2                   |           | 35.110                | 123.481         | 110.165       | 86.74              | n.a.           |
| Total:              |           |                       | 142.363         | 130.652       | 100.00             |                |

HPLC spectra for compound *ent*-**3a** ((*S*)-L1)

Chiralcel IC column, *n*-hexane/*i*-PrOH = 100:10, flow rate = 1.0 mL/min,  $\lambda$  = 254 nm,  $t_R$  (major isomer) = 19.713 min,  $t_R$  (minor isomer) = 23.358 min.

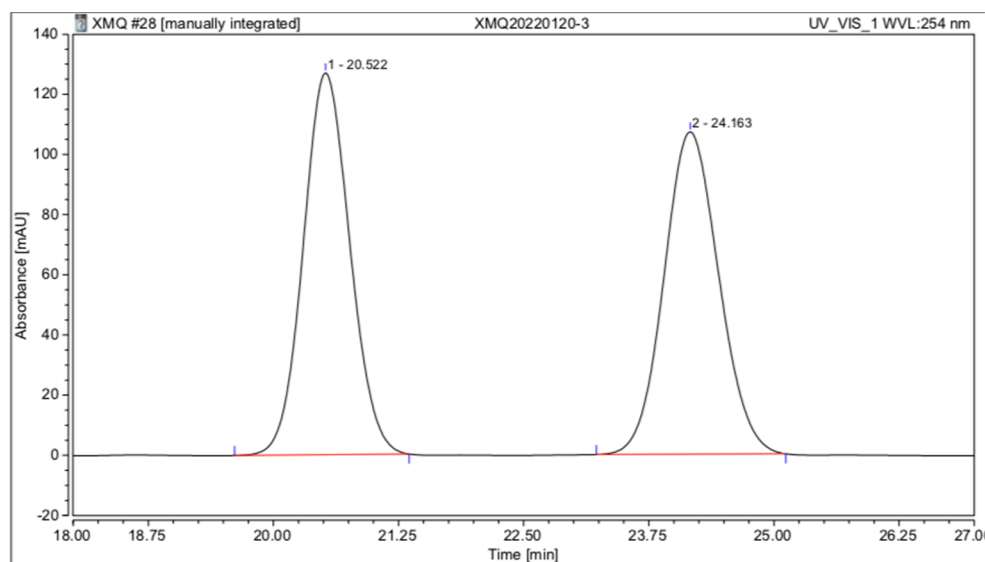

| Integration Results |           |                       |                 |                |                    |                |
|---------------------|-----------|-----------------------|-----------------|----------------|--------------------|----------------|
| No.                 | Peak Name | Retention Time<br>min | Area<br>mAU*min | Height<br>mAU  | Relative Area<br>% | Amount<br>n.a. |
| 1                   |           | 20.522                | 68.535          | 126.902        | 50.16              | n.a.           |
| 2                   |           | 24.163                | 68.106          | 107.134        | 49.84              | n.a.           |
| <b>Total:</b>       |           |                       | <b>136.641</b>  | <b>234.036</b> | <b>100.00</b>      |                |

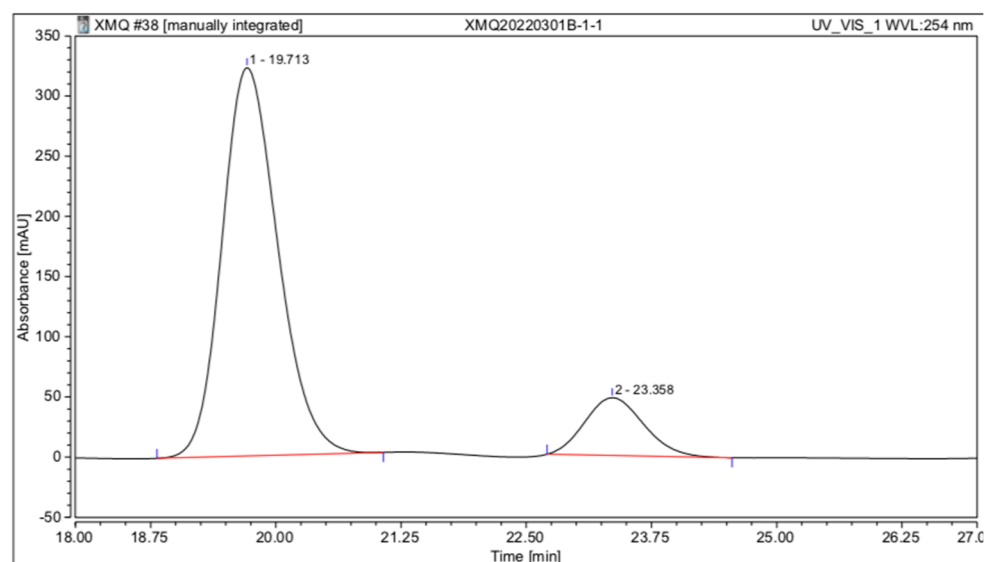

| Integration Results |           |                       |                 |                |                    |                |
|---------------------|-----------|-----------------------|-----------------|----------------|--------------------|----------------|
| No.                 | Peak Name | Retention Time<br>min | Area<br>mAU*min | Height<br>mAU  | Relative Area<br>% | Amount<br>n.a. |
| 1                   |           | 19.713                | 208.528         | 322.494        | 86.45              | n.a.           |
| 2                   |           | 23.358                | 32.687          | 47.981         | 13.55              | n.a.           |
| <b>Total:</b>       |           |                       | <b>241.214</b>  | <b>370.475</b> | <b>100.00</b>      |                |

HPLC spectra for compound *ent*-**3c** ((*R*)-L1)

Chiralcel IC column, *n*-hexane/*i*-PrOH = 100:10, flow rate = 1.0 mL/min,  $\lambda$  = 254 nm,  
 $t_R$  (major isomer) = 19.801 min,  $t_R$  (minor isomer) = 20.807 min.

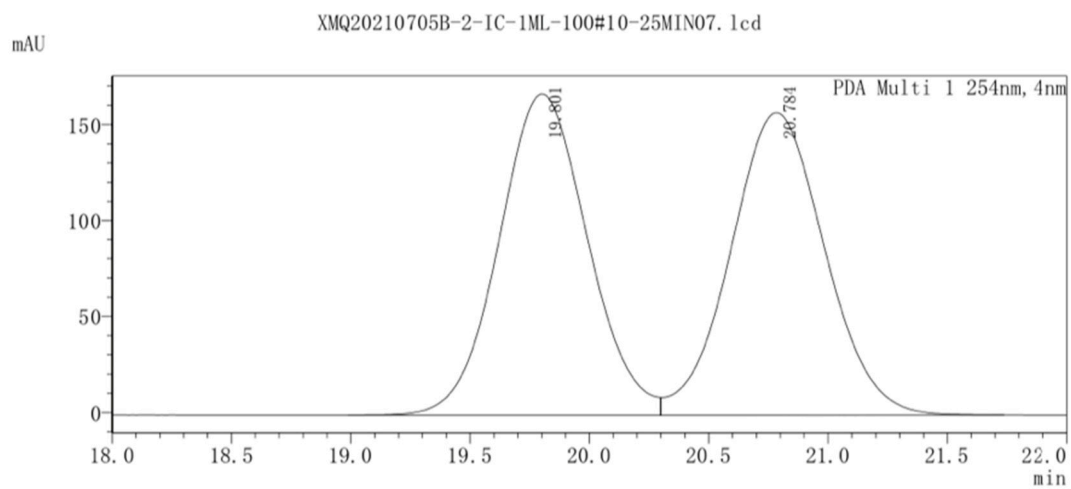

| Peak No | Retention time | Area    | Area%  | Height |
|---------|----------------|---------|--------|--------|
| 1       | 19.801         | 4310259 | 49.987 | 167211 |
| 2       | 20.784         | 4312423 | 50.013 | 157449 |
| Total   |                | 8622682 | 100.00 | 324660 |

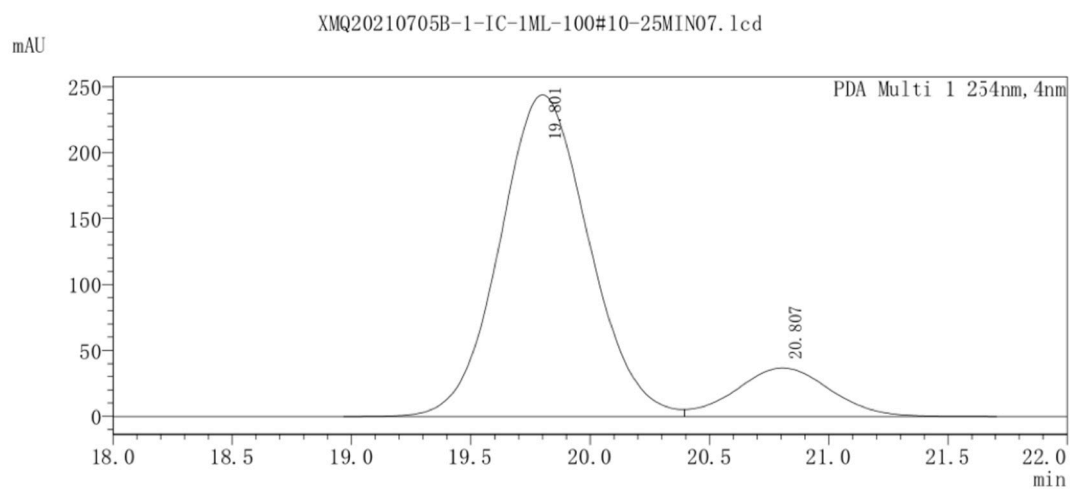

| Peak No | Retention time | Area    | Area%  | Height |
|---------|----------------|---------|--------|--------|
| 1       | 19.801         | 6329235 | 86.258 | 244163 |
| 2       | 20.807         | 1008338 | 13.742 | 36855  |
| Total   |                | 7337572 | 100.00 | 281018 |
